# Supplementary material
Source: MDPI journal article supplement (https://www.mdpi.com/2073-4344/11/6/719)
Supplement: s1 [file s1]

*SUPPORTING INFORMATION*

**Tandem olefin metathesis/ $\alpha$ -ketohydroxylation  
revisited**

Michał Patrzałek, Aleksandra Zasada, Anna Kajetanowicz,\* and Karol Grela\*

Biological and Chemical Research Centre, Faculty of Chemistry, University of  
Warsaw, Żwirki i Wigury Street 101, 02-089 Warsaw, Poland

email: kl.grela@uw.edu.pl, a.kajetanowicz@uw.edu.pl

## Table of Contents

|                                                                                                                                           |    |
|-------------------------------------------------------------------------------------------------------------------------------------------|----|
| General Remarks.....                                                                                                                      | 3  |
| Protocols.....                                                                                                                            | 5  |
| General procedure for RCM reactions .....                                                                                                 | 5  |
| General procedure for macroRCM reactions .....                                                                                            | 5  |
| General procedure for selfCM reactions .....                                                                                              | 6  |
| General procedure for oxidation reactions .....                                                                                           | 6  |
| Results .....                                                                                                                             | 7  |
| Influence of various conditions on tandem metathesis/ $\alpha$ -ketohydroxylation of diethyl<br>diallylmalonate (DEDAM, <b>S1</b> ) ..... | 7  |
| RCM and macroRCM reactions .....                                                                                                          | 8  |
| selfCM reactions .....                                                                                                                    | 9  |
| Analytical Data.....                                                                                                                      | 11 |
| <sup>1</sup> H and <sup>13</sup> C NMR Spectra.....                                                                                       | 16 |
| References .....                                                                                                                          | 35 |

## General Remarks

All reactions requiring exclusion of oxygen and moisture were carried out in oven-dried glassware with dry solvents (purified using *MBraun* SPS) under a dry and oxygen-free atmosphere using Schlenk technique. The addition of dry solvents or reagents was carried out using argon flushed stainless steel cannulas and plastic syringes.

**Nuclear Magnetic Resonance (NMR):**  $^1\text{H}$  and  $^{13}\text{C}$  NMR spectra were recorded on *Agilent* Mercury 400 MHz spectrometer, at ambient temperature with  $\text{CDCl}_3$  used as a solvent. Chemical shifts ( $\delta$ ) are given in parts per million (ppm) downfield from tetramethylsilane with a residual protio solvent signal used as a reference:  $\text{CDCl}_3$  ( $\delta_{\text{H}} = 7.26$  ppm,  $\delta_{\text{C}} = 77.16$  ppm)  $\text{CD}_3\text{OD}$  ( $\delta_{\text{H}} = 3.31$  ppm,  $\delta_{\text{C}} = 47.6$  ppm). Coupling constants ( $J$ ) are reported in hertz (Hz) and refer to  $H,H$ -couplings. The following abbreviations are used in order to indicate the signal multiplicity: s (singlet), d (doublet), t (triplet), q (quartet), quin (quintet), sext (sextet), hept (heptet), dd (doublet of doublet), dt (doublet of triplet), ddd (doublet of doublet of doublet) etc., bs (broad signal), m (multiplet). The obtained data was processed using MestReNova.

**High-Resolution Mass Spectrometry (HRMS):** HRMS were provided by the analytical laboratory at the Institute of Organic Chemistry, Polish Academy of Sciences (PAS).

**IR spectra** were recorded on a Perkin-Elmer Spectrum One FTIR spectrometer or JASCO FT/IR-6200. Substances were applied as a film, solid or in solution. The obtained data was processed with the software Omni32. Wavenumbers are given in  $\text{cm}^{-1}$ .

**Gas Chromatography (GC):** GC measurements were carried out using *PerkinElmer Clarus 580* with FID detector employing InertCap 5MS-Sil Capillary Column (inner diameter 0.25 mm, length 30 m, df 0.50  $\mu\text{m}$ ) and helium as a carrier gas.

**Column Chromatography (CC):** CC was performed using *Merck* Millipore silica gel (60, particle size 0.043 – 0.063 nm) with EtOAc/*n*-hexane system as an eluent, unless otherwise stated.

**Thin Layer Chromatography (TLC):** TLC was performed using *Merck* Silica Gel 60 F254

precoated aluminium sheets (0.25 mm thickness). Substances were visualised using UV-light (254 or 365 nm) or by stains:  $\text{KMnO}_4/\text{K}_2\text{CO}_3/\text{NaOH}$  (aqueous solution) or anisaldehyde/ $\text{H}_2\text{SO}_4$  (ethanolic solution).

### Solvents

Analytical grade ethyl acetate (EtOAc) used for metathesis reactions was dried over 4 Å molecular sieves (dried overnight in the oven at 300 °C prior to use) for 7 days, distilled, and stored under argon.

Analytical grade ethyl acetate (EtOAc) and acetonitrile (ACN) used in oxidation reaction were used without any purification together with distilled water.

### Reagents

All common laboratory reagents ( $\text{MgSO}_4$ ,  $\text{NaHCO}_3$ , Oxone™) were purchased from Avantor Performance Materials Poland S.A. and used as received.

Substrate **1**, **5**, and **9-15** were purchased from Sigma-Aldrich. Substrates **2**,<sup>[1]</sup> **3**,<sup>[2]</sup> **4**,<sup>[3]</sup> **6**,<sup>[4]</sup> **7**,<sup>[5]</sup> **8**,<sup>[6]</sup> **16**,<sup>[7]</sup> **17**,<sup>[8]</sup> were prepared according to literature procedures. All substrates had been freeze/pump/thaw degassed and stored under Ar over activated 4 Å molecular sieves for at least 12 h prior to use.

SnatchCat Metal Scavenger (1,4-bis(2-isocyanopropyl)piperazine) was prepared according to literature procedure<sup>[9]</sup> and used as a solution in EtOAc (C = 10 mg/mL) in order to quench metathesis reactions.

## Protocols

### General procedure for RCM reactions

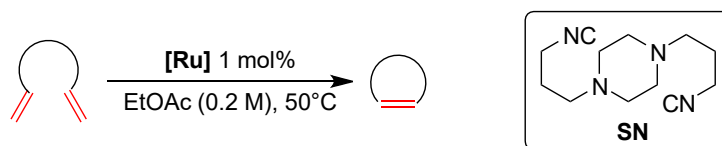

**Scheme S1.** General scheme of RCM reaction (first step in tandem metathesis/ $\alpha$ -ketohydroxylation).

To a stirred solution of diene in EtOAc (approx. 0.2 M) 1 mol% of catalyst was added and the mixture was stirred at 50 °C until the full conversion was reached (it was monitored *via* TLC plate) but no longer than 4 h. Next, the mixture was cooled to room temperature and used directly in the oxidation step. In some cases, after metathesis reaction 4.4 mol% of SnatchCat (**SN**) was added and the mixture was stirred for 30 min. before oxidation step.

### General procedure for macroRCM reactions

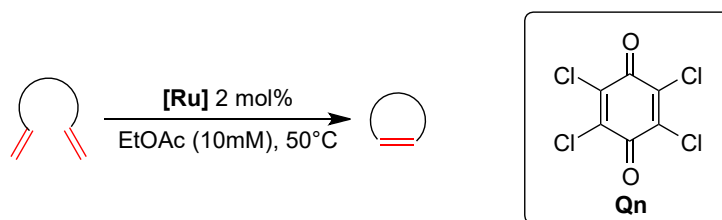

**Scheme S2.** General scheme of macroRCM reaction (first step in tandem metathesis/ $\alpha$ -ketohydroxylation).

To a stirred solution of diene in EtOAc (10 mM) 2 mol% of catalyst and 2,3,4,5-tetrachloro-1,4-benzoquinone (**Qn**, 8 mol%) was added, and the mixture was stirred at 50 °C until the full conversion was reached (it was monitored *via* TLC plate) but no longer than 24 h. Next, the mixture was cooled to room temperature, some of the solvent was evaporated to achieved 0.2 M diene concentration, and the residue was used directly in the oxidation step.

### General procedure for selfCM reactions

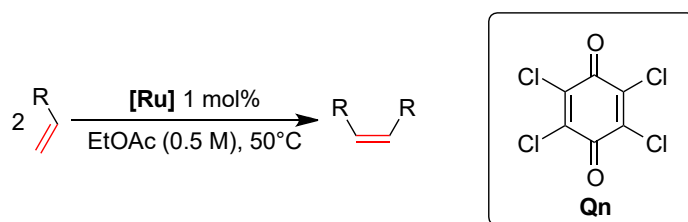

**Scheme S3.** General scheme of selfCM reaction (first step in tandem metathesis/ $\alpha$ -ketohydroxylation).

To a stirred solution of olefin in EtOAc (0.5 M) 1 mol% of catalyst and 2,3,4,5-tetrachloro-1,4-benzoquinone (**Qn**, 8 mol%) were added, and the mixture was stirred at 50 °C until the full conversion was reached (it was monitored *via* TLC plate) but no longer than 4 h. Next, the mixture was cooled to room temperature and used directly in the oxidation step. In some cases, after metathesis reaction 4.4 mol% of SnatchCat (**SN**) was added and the mixture was stirred for 30 min. before oxidation step.

### General procedure for oxidation reactions

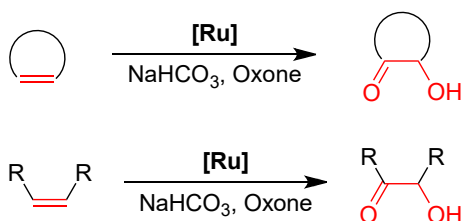

**Scheme S4.** General scheme of oxidation reaction (second step in tandem metathesis/ $\alpha$ -ketohydroxylation).

To the previously prepared solution of metathesis product, acetonitrile and water were added to obtain EtOAc:ACN:H<sub>2</sub>O, 6:6:1 v:v:v mixture with final concentration of the olefin around 0.08 M. Next, NaHCO<sub>3</sub> (2.5 equiv.) and Oxone (5 equiv.) were added and the mixture was vigorously stirred at room temperature. After a while colourless solution become yellow or brown. When the full conversion was reached (it was monitored *via* TLC plate), the resulting mixture was diluted with EtOAc and filtered. The filtrate was washed with saturated solution of Na<sub>2</sub>SO<sub>3</sub>, followed by water and brine. The organic layer was dried over Na<sub>2</sub>SO<sub>4</sub>, filtered, the solvent was evaporated, and the residue was purified by column chromatography with EtOAc/*n*-hexane as eluent.

## Results

### Influence of various conditions on tandem metathesis/ $\alpha$ -ketohydroxylation of diethyl diallylmalonate (DEDAM, S1)

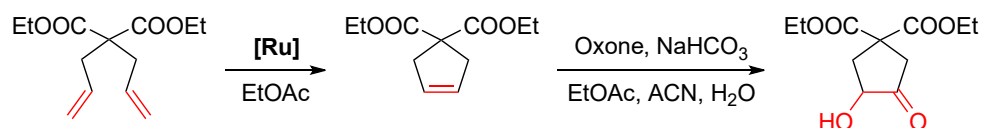

**Scheme S5.** Tandem metathesis/ $\alpha$ -ketohydroxylation of DEDAM (S1).

**Table S1.** Influence of time on the oxidation step in tandem metathesis/ $\alpha$ -ketohydroxylation of DEDAM (S1) in the presence of 1 mol% of catalyst.

| Entry | Catalyst   | Time of oxidation<br>step (min) | GC Yield (%) |
|-------|------------|---------------------------------|--------------|
| 1     | <b>Ru1</b> | 15                              | 54           |
| 2     |            | 30                              | 51           |
| 3     |            | 45                              | 53           |
| 4     |            | 60                              | 52           |
| 5     | <b>Ru2</b> | 15                              | 46           |
| 6     |            | 30                              | 45           |
| 7     |            | 45                              | 49           |
| 8     |            | 60                              | 52           |
| 9     | <b>Ru3</b> | 15                              | 43           |
| 10    |            | 30                              | 51           |
| 11    |            | 45                              | 53           |
| 12    |            | 60                              | 57           |
| 13    | <b>Ru4</b> | 15                              | 39           |
| 14    |            | 30                              | 46           |
| 15    |            | 45                              | 51           |
| 16    |            | 60                              | 51           |
| 17    | <b>Ru5</b> | 15                              | 38           |
| 18    |            | 30                              | 49           |
| 19    |            | 45                              | 53           |
| 20    |            | 60                              | 54           |

**Conditions:** Metathesis step: Ru-catalyst (1 mol%), 50 °C. 0.2 M in EtOAc, the reaction was performed until full conversion was reached. Oxidation Step: NaHCO<sub>3</sub> (2.5 equiv.), then Oxone™ (5 equiv.), RT, 1 h, 0.08 M in EtOAc/MeCN/H<sub>2</sub>O (6/6/1 v/v/v).

**Table S2.** Influence of time on the oxidation step in tandem metathesis/ $\alpha$ -ketohydroxylation of DEDAM (**S1**) in the presence of 0.1 mol% of catalyst.

| Entry | Catalyst   | Time of oxidation step (min) | GC Yield (%) |
|-------|------------|------------------------------|--------------|
| 1     | <b>Ru1</b> | 75                           | 37           |
| 2     |            | 90                           | 39           |
| 3     |            | 105                          | 40           |
| 4     |            | 120                          | 32           |
| 5     | <b>Ru2</b> | 75                           | 33           |
| 6     |            | 90                           | 32           |
| 7     |            | 105                          | 31           |
| 8     |            | 120                          | 22           |
| 9     | <b>Ru3</b> | 75                           | 52           |
| 10    |            | 90                           | 49           |
| 11    |            | 105                          | 52           |
| 12    |            | 120                          | 50           |
| 13    | <b>Ru4</b> | 75                           | 46           |
| 14    |            | 90                           | 43           |
| 15    |            | 105                          | 44           |
| 16    |            | 120                          | 43           |
| 17    | <b>Ru5</b> | 75                           | 42           |
| 18    |            | 90                           | 43           |
| 19    |            | 105                          | 46           |
| 20    |            | 120                          | 45           |

**Conditions:** Metathesis step: Ru-catalyst (0.1 mol%), 50 °C. 0.2 M in EtOAc, the reaction was performed until full conversion was reached. Oxidation Step: NaHCO<sub>3</sub> (2.5 equiv.), then Oxone™ (5 equiv.), RT, 1 h, 0.08 M in EtOAc/MeCN/H<sub>2</sub>O (6/6/1 v/v/v).

### RCM and macroRCM reactions

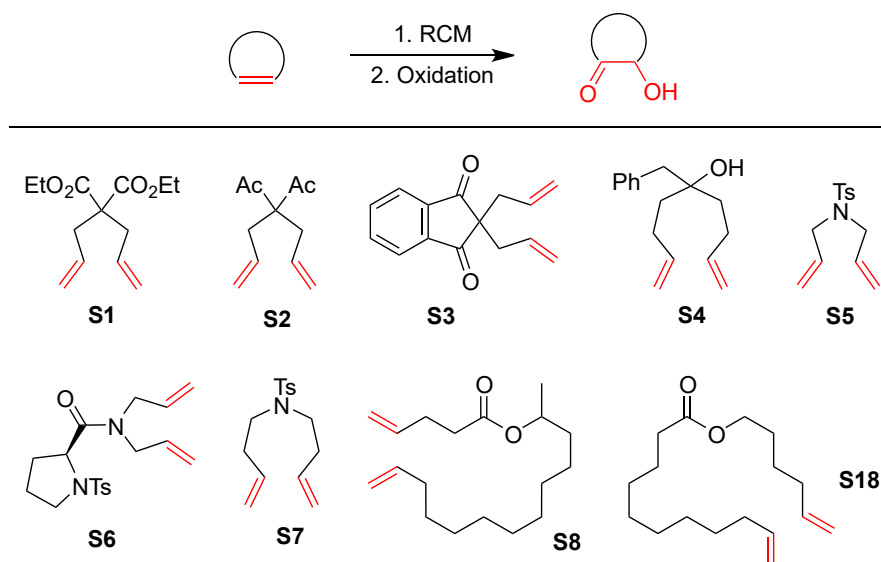

**Scheme S6.** Tandem metathesis/ $\alpha$ -ketohydroxylation of dienes.



**Table S3.** Results of tandem RCM/ $\alpha$ -ketohydroxylation reactions.

| Entry             | Catalyst | Substrate | RCM yield <sup>a</sup> (%) | Product yield (%) |
|-------------------|----------|-----------|----------------------------|-------------------|
| 1                 | Ru2      | S2        | 99                         | 46                |
| 2                 |          | S4        | 99                         | 32                |
| 3                 | Ru3      | S1        | 99                         | 51                |
| 4 <sup>b</sup>    |          | S1        | 99                         | traces            |
| 5                 |          | S4        | 89                         | 26                |
| 6 <sup>b</sup>    |          | S4        | 89                         | 31                |
| 7                 |          | S7        | 93                         | 61                |
| 8 <sup>b</sup>    |          | S7        | 92                         | 55                |
| 9                 | Ru5      | S1        | 99                         | 54                |
| 10 <sup>b</sup>   |          | S1        | 99                         | 90                |
| 11                |          | S2        | nd                         | 26                |
| 12                |          | S3        | nd                         | 40                |
| 13                |          | S4        | 99                         | 28                |
| 14 <sup>b</sup>   |          | S4        | 99                         | 35                |
| 15                |          | S5        | 99                         | traces            |
| 16 <sup>b</sup>   |          | S5        | 99                         | traces            |
| 17                |          | S6        | 99                         | traces            |
| 18                |          | S6        | 99                         | traces            |
| 19                |          | S7        | 99                         | 43                |
| 20 <sup>b</sup>   |          | S7        | 99                         | 30                |
| 21 <sup>c</sup>   |          | S8        | nd                         | 30                |
| 22 <sup>c</sup>   |          | S18       | 92                         | 30                |
| 23 <sup>b,c</sup> |          | S18       | 92                         | 21                |

**Conditions:** Metathesis step: Ru-catalyst (1 mol%), 50 °C. 0.2 M in EtOAc, the reaction was performed until full conversion was reached. Oxidation step: NaHCO<sub>3</sub> (2.5 equiv.), then Oxone™ (5 equiv.), RT, 0.08 M in EtOAc/MeCN/H<sub>2</sub>O (6/6/1 v/v/v). <sup>a</sup> Calculated based on GC measurements. <sup>b</sup> After metathesis step 4.4 mol% of SnatchCat (SN) was added. <sup>c</sup> Metathesis step: Ru-catalyst (2 mol%), quinone (Qn, 8 mol%), 50 °C. 0.01 M in EtOAc, before oxidation step the solution was concentrated to 0.2 M.

**selfCM reactions**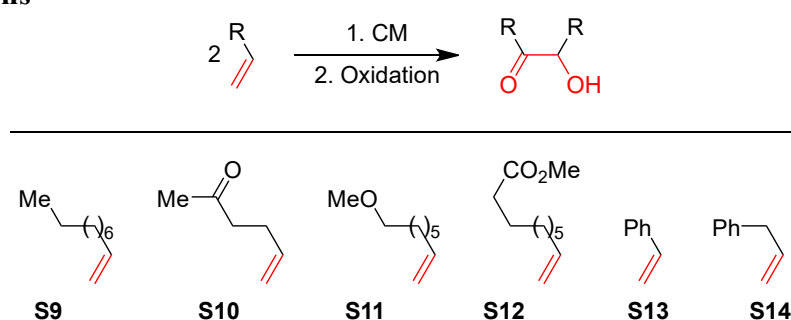**Scheme S7.** Tandem metathesis/ $\alpha$ -ketohydroxylation of olefins.

**Table S4.** Results of tandem selfCM/ $\alpha$ -ketohydroxylation reactions.

| Entry | Catalyst   | Substrate  | CM yield <sup>a</sup> (%) | Product yield (%) |
|-------|------------|------------|---------------------------|-------------------|
| 1     | <b>Ru2</b> | <b>S9</b>  | nd                        | 45                |
| 2     |            | <b>S10</b> | nd                        | 40                |
| 3     |            | <b>S11</b> | nd                        | 44                |
| 4     | <b>Ru5</b> | <b>S9</b>  | nd                        | 55                |
| 5     |            | <b>S10</b> | nd                        | 20                |
| 6     |            | <b>S11</b> | nd                        | 44                |
| 7     |            | <b>S13</b> | 84                        | 44                |
| 8     |            | <b>S14</b> | 78                        | 40                |
| 9     |            | <b>S15</b> | 44                        | 40                |
| 10    |            | <b>S12</b> | nd                        | 45                |

**Conditions:** Metathesis step: Ru-catalyst (1 mol%), quinone (**Qn**, 4 mol%), 50 °C, 0.5 M in EtOAc, the reaction was performed until full conversion was reached. Oxidation step: NaHCO<sub>3</sub> (2.5 equiv.), then Oxone™ (5 equiv.), RT, 0.08 M in EtOAc/MeCN/H<sub>2</sub>O (6/6/1 v/v/v). <sup>a</sup> Calculated based on GC measurements.

## Analytical Data

### Diethyl 3-hydroxy-4-oxocyclopentane-1,1-dicarboxylate (P1b)<sup>[10]</sup>

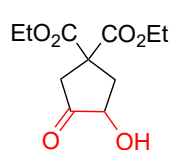

<sup>1</sup>H NMR (400 MHz, CDCl<sub>3</sub>) δ 4.32 – 4.14 (m, 6H), 3.06 – 2.96 (m, 2H), 2.89 (d, *J* = 9.2 Hz, 2H), 2.15 (dd, *J* = 13.2, 11.3 Hz, 1H), 1.26 (td, *J* = 7.1, 2.5 Hz, 8H).

<sup>13</sup>C NMR (101 MHz, CDCl<sub>3</sub>) δ 213.2, 170.8, 170.1, 73.7, 62.5, 62.4, 62.3, 61.9, 61.8, 57.4, 54.3, 52.2, 41.4, 37.1, 13.9.

HRMS TOF MS ES<sup>-</sup> (ESI): *m/z* calcd. for C<sub>11</sub>H<sub>15</sub>O<sub>6</sub>: 243.0869, found 243.0872.

### 1,1'-(3-hydroxy-4-oxocyclopentane-1,1-diyl)bis(ethan-1-one) (P2b)

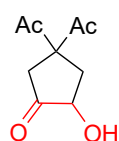

<sup>1</sup>H NMR (400 MHz, CDCl<sub>3</sub>) δ 4.07 (t, *J* = 4.5 Hz, 1H), 2.40 – 2.27 (m, 4H), 2.21 – 2.13 (m, 3H), 2.08 (s, 2H).

<sup>13</sup>C NMR (101 MHz, CDCl<sub>3</sub>) δ 213.4, 110.0, 73.1, 71.7, 35.8, 26.5, 26.2.

HRMS TOF MS ES<sup>+</sup> (ESI): *m/z* calcd. for C<sub>9</sub>H<sub>11</sub>O<sub>4</sub>Na: [M+Na<sup>+</sup>] 183.0657, found 183.0656.

IR ATR: ν = 3054, 3004, 2987, 1698, 1422, 1359, 1264, 1103, 895, 733, 703 cm<sup>-1</sup>.

### 3-hydroxyspiro[cyclopentane-1,2'-indene]-1',3',4-trione (P3b)

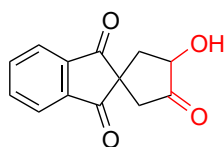

<sup>1</sup>H NMR (400 MHz, CDCl<sub>3</sub>) δ 8.03 (m, 2H), 7.97 – 7.88 (m, 2H), 4.74 (ddd, *J* = 10.6, 8.5, 1.6 Hz, 1H), 2.98 (s, 1H), 2.65 (s, 1H), 2.62 – 2.56 (m, 1H), 2.56 – 2.46 (m, 1H), 2.20 – 2.09 (m, 2H).

<sup>13</sup>C NMR (101 MHz, CDCl<sub>3</sub>) δ 213.0, 202.1, 200.9, 141.3, 140.7, 136.6, 136.5, 124.1, 124.0, 73.8, 52.1, 39.0, 37.2, 31.0.

HRMS TOF MS ES<sup>+</sup> (ESI): *m/z* calcd. for C<sub>13</sub>H<sub>10</sub>O<sub>4</sub>Na: [M+Na<sup>+</sup>] 253.0477, found 253.0473.

IR ATR: ν = 3054, 2986, 1757, 1708, 1598, 1421, 1264, 1096, 895, 731, 703 cm<sup>-1</sup>.

### 5-benzyl-2,5-dihydroxycycloheptan-1-one (P4b)

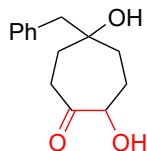

<sup>1</sup>H NMR (400 MHz, CDCl<sub>3</sub>) δ 7.23 (m, 5H), 3.65 (dd, *J* = 10.5, 5.9 Hz, 1H), 2.92 (s, 2H), 2.33 (dtd, *J* = 11.2, 8.5, 4.1 Hz, 1H), 1.96 (td, *J* = 10.3, 6.1 Hz, 2H), 1.65 – 1.55 (m, 2H), 1.43 (dt, *J* = 14.9, 5.5 Hz, 2H).

<sup>13</sup>C NMR (101 MHz, CDCl<sub>3</sub>) δ 137.2, 130.3, 128.2, 128.1, 126.5, 126.4, 105.6, 104.2, 83.8, 83.28, 71.7, 70.2, 46.4, 45.8, 34.7, 32.6, 32.4, 31.4, 30.6, 29.4, 26.7, 26.1.

HRMS TOF MS ES<sup>+</sup> (ESI): *m/z* calcd. for C<sub>14</sub>H<sub>18</sub>O<sub>3</sub>Na: [M+Na<sup>+</sup>] 257.1154, found 257.1165.

IR ATR: ν = 3367, 3185, 3058, 3026, 2945, 2913, 2848, 1767, 1681, 1603, 1496, 1471, 1452, 1362, 1329, 1266, 1229, 1180, 1156, 1137, 1103, 1076, 1053, 1027, 996, 981, 950, 916, 884, 868, 844, 807, 763, 734, 699, 632, 562, 488 cm<sup>-1</sup>.

### 5-hydroxy-1-tosylazepan-4-one (P7b)<sup>[10]</sup>

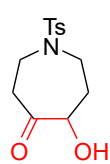

<sup>1</sup>H NMR (400 MHz, CDCl<sub>3</sub>) (d, *J* = 8.0 Hz, 2H), 7.33 (d, *J* = 8.0 Hz, 2H), 4.32 (dt, *J* = 11.0, 3.9 Hz, 1H), 3.85 (dt, *J* = 13.0, 4.0 Hz, 2H), 3.78 (d, *J* = 4.2 Hz, 1H), 3.08 – 3.00 (m, 1H), 3.00 – 2.95 (m, 1H), 2.91 (ddd, *J* = 18.2, 10.9, 3.7 Hz, 1H), 2.73 (ddd, *J* = 18.1, 5.1, 2.5 Hz, 1H), 2.44 (s, 3H), 2.19 – 2.10 (m, 2H), 1.84 (dtd, *J* = 14.7, 11.4, 3.5 Hz, 1H).

<sup>13</sup>C NMR (101 MHz, CDCl<sub>3</sub>) δ 210.0, 143.9, 135.5, 130.0, 127.0, 47.6, 43.5, 41.2, 34.2, 21.5.  
HRMS TOF MS ES<sup>+</sup> (ESI): *m/z* calcd. for C<sub>13</sub>H<sub>17</sub>NO<sub>4</sub>NaS: [M+Na<sup>+</sup>] 306.0776, found 306.0768.

### 6-hydroxy-16-methyloxacyclohexadecane-2,5-dione (P8b)

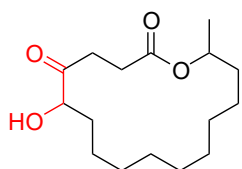

<sup>1</sup>H NMR (400 MHz, CD<sub>3</sub>OD) δ 4.95 (s, 1H), 4.29 – 4.14 (m, 1H), 4.07 (dd, *J* = 7.1, 4.8 Hz, 1H), 3.14 (ddd, *J* = 18.8, 10.1, 4.5 Hz, 1H), 3.00 (ddd, *J* = 18.7, 8.3, 5.3 Hz, 1H), 2.82 – 2.53 (m, 2H), 2.44 (ddq, *J* = 15.3, 10.9, 5.1 Hz, 2H), 1.75 (qt, *J* = 9.1, 5.6 Hz, 2H), 1.59 (ddt, *J* = 17.4, 8.7, 5.5 Hz, 2H), 1.49 – 1.34 (m, 9H), 1.34 – 1.24 (m, 10H), 1.20 (d, *J* = 6.3 Hz, 6H).

<sup>13</sup>C NMR (101 MHz, CD<sub>3</sub>OD) δ 212.7, 211.1, 173.0, 172.8, 48.2, 48.0, 47.8, 47.6, 47.4, 47.2, 47.0, 35.5, 35.1, 34.8, 33.6, 32.8, 32.8, 32.4, 28.9, 28.1, 27.4, 26.9, 26.7, 26.5, 26.4, 26.4, 26.3, 26.1, 26.0, 25.4, 25.1, 25.0, 24.8, 23.3, 23.1, 21.6, 21.4, 19.0, 18.9.

HRMS TOF MS ES<sup>+</sup> (ESI): *m/z* calcd. for C<sub>16</sub>H<sub>28</sub>O<sub>4</sub>Na: [M+Na<sup>+</sup>] 307.1885, found 307.1882.  
IR ATR: ν = 3054, 2984, 2930, 2856, 1720, 1264, 732, 703 cm<sup>-1</sup>.

### 5-hydroxy-16-methyloxacyclohexadecane-2,6-dione (P8b')

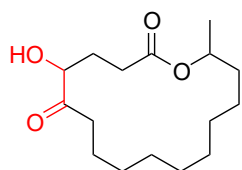

<sup>1</sup>H NMR (400 MHz, CD<sub>3</sub>OD) δ 5.02 – 4.90 (m, 1H), 4.21 (dd, *J* = 7.2, 4.5 Hz, 1H), 4.07 (dd, *J* = 8.8, 3.9 Hz, 1H), 2.65 – 2.26 (m, 3H), 2.25 – 2.02 (m, 1H), 2.00 – 1.86 (m, 1H), 1.75 – 1.66 (m, 1H), 1.66 – 1.50 (m, 2H), 1.50 – 1.33 (m, 4H), 1.33 – 1.29 (m, 3H), 1.29 – 1.17 (m, 3H).

<sup>13</sup>C NMR (101 MHz, CD<sub>3</sub>OD) δ 213.3, 212.6, 173.0, 173.0, 48.2, 48.0, 47.8, 47.6, 47.4, 47.2, 47.0, 36.0, 35.7, 35.3, 34.8, 30.9, 29.8, 29.4, 29.1, 28.6, 27.0, 27.0, 26.9, 26.9, 26.8, 26.8, 26.3, 26.3, 26.0, 25.8, 23.6, 23.2, 22.3, 21.7, 19.2, 18.9.

HRMS TOF MS ES<sup>+</sup> (ESI): *m/z* calcd. for C<sub>16</sub>H<sub>28</sub>O<sub>4</sub>Na: [M+Na<sup>+</sup>] 307.1885, found 307.1882.  
IR ATR: ν = 3054, 2984, 2930, 2856, 1720, 1264, 732, 703 cm<sup>-1</sup>.

### 11-hydroxyoxacyclohexadecane-2,12-dione and 12-hydroxyoxacyclohexadecane-2,11-dione (P18b/P18b')

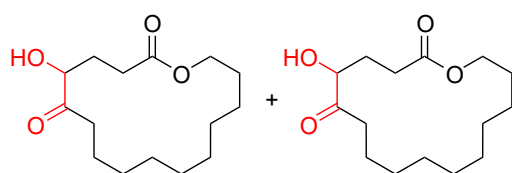

$^1\text{H}$  NMR (400 MHz,  $\text{CDCl}_3$ )  $\delta$  4.27 (ddq,  $J = 20.9$ , 7.6, 4.2 Hz, 2H), 4.11 – 3.86 (m, 1H), 2.75 – 2.58 (m, 1H), 2.52 – 2.32 (m, 1H), 2.28 (dt,  $J = 10.4$ , 6.2 Hz, 2H), 2.12 – 1.85 (m, 1H), 1.85 – 1.78 (m, 1H),

1.75 (t,  $J = 4.6$  Hz, 1H), 1.74 – 1.65 (m, 2H), 1.65 – 1.60 (m, 2H), 1.60 – 1.44 (m, 2H), 1.28 (dh,  $J = 21.2$ , 8.2, 7.5 Hz, 9H).

$^{13}\text{C}$  NMR (101 MHz,  $\text{CDCl}_3$ )  $\delta$  212.3, 212.2, 174.0, 173.9, 114.8, 114.1, 77.4, 64.1, 63.3, 36.9, 36.7, 34.3, 34.1, 33.8, 33.6, 33.4, 32.9, 29.0, 28.1, 27.8, 27.5, 27.3, 27.2, 27.1, 27.1, 27.0, 26.8, 26.6, 25.2, 24.9, 24.5, 21.6, 21.5, 20.3, 20.11.

HRMS TOF MS  $\text{ES}^+$  (ESI):  $m/z$  calcd. for  $\text{C}_{15}\text{H}_{26}\text{O}_4\text{Na}$ :  $[\text{M}+\text{Na}^+]$  293.1729, found 293.1718.

IR ATR:  $\nu = 3481, 3057, 2928, 1725, 1459, 1357, 1265, 1170, 1106, 734, 702\text{ cm}^{-1}$ .

### 10-hydroxyoctadecan-9-one (P9b)<sup>[11]</sup>

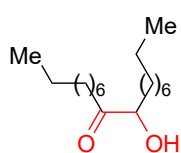

$^1\text{H}$  NMR (400 MHz,  $\text{CDCl}_3$ )  $\delta$  4.16 (dt,  $J = 7.8, 4.2$  Hz, 1H), 3.50 (d,  $J = 4.9$  Hz, 1H), 2.43 (tt,  $J = 16.8, 8.3$  Hz, 2H), 1.81 (ddt,  $J = 13.9, 9.2, 4.5$  Hz, 1H), 1.62 (dd,  $J = 12.7, 5.8$  Hz, 2H), 1.59 – 1.47 (m, 2H), 1.47 – 1.40 (m, 1H), 1.36 – 1.23 (m, 20H), 0.87 (t,  $J = 6.6$  Hz, 6H).

$^{13}\text{C}$  NMR (101 MHz,  $\text{CDCl}_3$ )  $\delta$  212.6, 59.0, 37.8, 36.1, 33.9, 32.1, 31.8, 31.8, 31.6, 29.5, 29.4, 29.3, 29.2, 29.1, 29.1, 29.0, 26.1, 24.8, 23.6, 23.0, 22.7, 22.6, 14.1.

HRMS TOF MS  $\text{ES}^+$  (ESI):  $m/z$  calcd. for  $\text{C}_{18}\text{H}_{36}\text{O}_2\text{Na}$ :  $[\text{M}+\text{Na}^+]$  307.2613, found 307.2603.

### 6-hydroxydecane-2,5,9-trione (P10b)

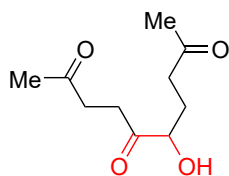

$^1\text{H}$  NMR (400 MHz,  $\text{CDCl}_3$ )  $\delta$  4.25 (dd,  $J = 8.1, 4.1$  Hz, 1H), 3.49 (d,  $J = 4.7$  Hz, 1H), 2.87 – 2.77 (m, 3H), 2.75 – 2.58 (m, 4H), 2.18 (d,  $J = 9.9$  Hz, 8H), 1.80 (d,  $J = 7.2$  Hz, 1H), 1.25 (s, 1H).

$^{13}\text{C}$  NMR (101 MHz,  $\text{CDCl}_3$ )  $\delta$  211.0, 38.4, 37.0, 31.5, 30.1, 29.8, 27.3.

HRMS TOF MS  $\text{ES}^+$  (ESI):  $m/z$  calcd. for  $\text{C}_{10}\text{H}_{16}\text{O}_4\text{Na}$ :  $[\text{M}+\text{Na}^+]$  223.0946, found 223.0938.

IR ATR:  $\nu = 3399, 3057, 2956, 2923, 2853, 1710, 1635, 1603, 1401, 1359, 1266, 1164, 1084, 732, 701\text{ cm}^{-1}$ .

### 7-hydroxy-1,12-dimethoxydodecan-6-one (P11b)

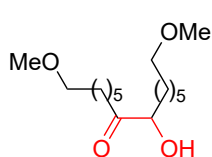

$^1\text{H}$  NMR (400 MHz,  $\text{CDCl}_3$ )  $\delta$  4.14 (dt,  $J = 7.8, 4.0$  Hz, 1H), 3.33 (d,  $J = 14.1$  Hz, 8H), 2.44 (q,  $J = 7.6$  Hz, 2H), 1.86 – 1.74 (m, 1H), 1.62 (d,  $J = 7.3$  Hz, 2H), 1.57 – 1.39 (m, 5H), 1.33 (ddt,  $J = 13.1, 9.4, 5.3$  Hz, 8H).

$^{13}\text{C}$  NMR (101 MHz,  $\text{CDCl}_3$ )  $\delta$  212.4, 72.8, 72.7, 58.6, 58.6, 37.7, 33.7, 29.5,

29.4, 29.3, 29.0, 26.0, 25.9, 25.8, 24.8, 23.5.

HRMS TOF MS  $\text{ES}^+$  (ESI):  $m/z$  calcd. for  $\text{C}_{16}\text{H}_{32}\text{O}_4\text{Na}$ :  $[\text{M}+\text{Na}^+]$  311.2198, found 311.2210.

IR ATR:  $\nu = 3054, 3025, 2934, 2860, 1708, 1462, 1264, 1114, 895, 732, 703\text{ cm}^{-1}$ .

**dimethyl 2,19-dihydroxy-10-methyl-11-oxoicosanedioate (P12b)**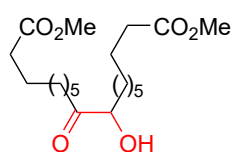

$^1\text{H}$  NMR (400 MHz,  $\text{CDCl}_3$ )  $\delta$  4.14 (dd,  $J$  = 7.5, 3.6 Hz, 1H), 3.65 (s, 6H), 2.52 – 2.28 (m, 6H), 2.26 (s, 2H), 1.60 (q,  $J$  = 7.0 Hz, 8H), 1.50 – 1.41 (m, 3H), 1.34 – 1.19 (m, 15H).

$^{13}\text{C}$  NMR (101 MHz,  $\text{CDCl}_3$ )  $\delta$  212.4, 174.3, 174.3, 51.5, 37.8, 34.0, 34.0, 33.7, 29.2, 29.1, 29.0, 29.0, 28.9, 24.8, 24.8, 24.8, 23.5.

HRMS TOF MS  $\text{ES}^+$  (ESI):  $m/z$  calcd. for  $\text{C}_{20}\text{H}_{36}\text{O}_6\text{Na}$ :  $[\text{M}+\text{Na}^+]$  395.2410, found 395.2428.

IR ATR:  $\nu$  = 3055, 2987, 2934, 2857, 1731, 1437, 1362, 1264, 1199, 1173, 895, 732, 703  $\text{cm}^{-1}$ .

**2-hydroxy-1,2-diphenylethan-1-one (P13b)<sup>[12]</sup>**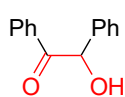

$^1\text{H}$  NMR (400 MHz,  $\text{CDCl}_3$ )  $\delta$  7.95 – 7.88 (m, 1H), 7.52 (t,  $J$  = 7.4 Hz, 1H), 7.40 (t,  $J$  = 7.7 Hz, 2H), 7.36 – 7.31 (m, 3H), 7.29 (dd,  $J$  = 7.4, 4.4 Hz, 3H), 5.95 (d,  $J$  = 6.0 Hz, 1H), 4.55 (d,  $J$  = 6.1 Hz, 1H).

$^{13}\text{C}$  NMR (101 MHz,  $\text{CDCl}_3$ )  $\delta$  198.9, 139.0, 133.9, 133.4, 129.2, 129.1, 128.7, 128.6, 127.8.

**3-hydroxy-1,4-diphenylbutan-2-one (P14b)<sup>[13]</sup>**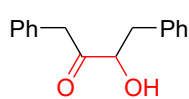

$^1\text{H}$  NMR (400 MHz,  $\text{CDCl}_3$ )  $\delta$  8.0 – 7.9 (m, 2H), 7.7 – 7.6 (m, 1H), 7.5 (ddd,  $J$  = 8.4, 7.1, 0.5 Hz, 1H), 7.3 – 7.2 (m, 4H), 7.1 – 7.1 (m, 1H), 5.3 (td,  $J$  = 6.9, 4.1 Hz, 1H), 3.7 (dd,  $J$  = 6.8, 0.4 Hz, 1H), 3.2 – 2.9 (m, 3H).

$^{13}\text{C}$  NMR (101 MHz,  $\text{CDCl}_3$ )  $\delta$  201.0, 134.1, 129.4, 129.0, 128.6, 128.3, 126.8, 73.7, 41.9.

HRMS TOF MS  $\text{ES}^+$  (ESI):  $m/z$  calcd. for  $\text{C}_{14}\text{H}_{12}\text{O}_2\text{Na}$ :  $[\text{M}+\text{Na}^+]$  235.0735, found 235.0733.

**dimethyl 5,5'-(2-hydroxy-3-oxobutane-1,4-diyl)bis(2-methoxybenzoate) (P15b)**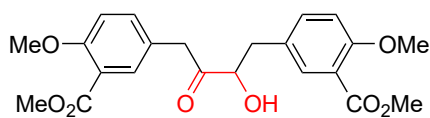

$^1\text{H}$  NMR (400 MHz,  $\text{CDCl}_3$ )  $\delta$  7.0 – 6.9 (m, 2H), 6.8 – 6.7 (m, 4H), 4.3 (s, 1H), 3.8 – 3.7 (m, 6H), 3.7 (s, 1H), 3.1 (dd,  $J$  = 14.2, 4.6 Hz, 1H), 3.0 (s, 1H), 2.9 (dp,  $J$  = 15.6, 7.7

Hz, 1H), 2.3 (d,  $J$  = 2.5 Hz, 6H).

$^{13}\text{C}$  NMR (101 MHz,  $\text{CDCl}_3$ )  $\delta$  208.8, 207.0, 169.1, 169.0, 151.3, 151.2, 151.1, 139.1, 139.0, 138.7, 135.4, 131.7, 131.5, 123.1, 122.9, 122.8, 121.7, 121.5, 121.4, 113.6, 113.5, 113.3, 67.7, 55.9, 55.9, 55.9, 45.4, 45.3, 40.0, 20.7, 20.6.

HRMS TOF MS  $\text{ES}^+$  (ESI):  $m/z$  calcd. for  $\text{C}_{22}\text{H}_{24}\text{O}_8\text{Na}$ :  $[\text{M}+\text{Na}^+]$  439.1369, found 439.1360.

IR ATR:  $\nu$  = 3491, 3062, 3009, 2962, 2939, 2845, 1759, 1720, 1604, 1508, 1464, 1419, 1369, 1268, 1217, 1196, 1150, 1122, 1032, 1011, 903, 827, 732, 700, 647, 602  $\text{cm}^{-1}$ .

**bis((9*R*,13*R*,14*R*)-13-methyl-17-oxo-7,8,9,11,12,13,14,15,16,17-decahydro-6*H*-cyclopenta[*a*]phenanthren-3-yl) 3-hydroxy-4-oxohexanedioate (P16b)**

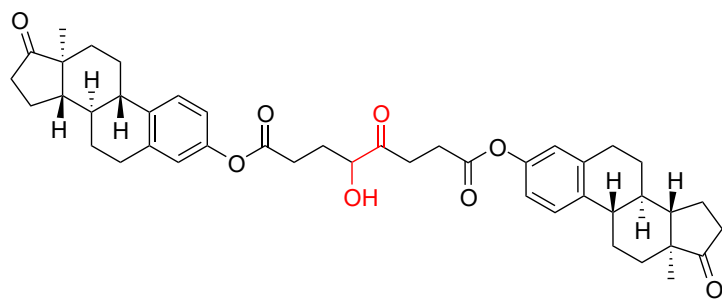

$^1\text{H}$  NMR (400 MHz,  $\text{CDCl}_3$ )  $\delta$  7.27 (d,  $J$  = 8.4 Hz, 3H), 6.89 – 6.77 (m, 5H), 4.41 – 4.32 (m, 1H), 2.90 (dt,  $J$  = 14.7, 10.2, 4.6 Hz, 10H), 2.83 – 2.76 (m, 2H), 2.50 (dd,  $J$  = 18.9, 8.7 Hz, 3H), 2.38 (dd,  $J$  = 9.7, 4.9 Hz, 3H), 2.30 – 2.24 (m, 2H),

2.11 (dd,  $J$  = 16.7, 8.0 Hz, 3H), 2.02 – 1.89 (m, 6H), 1.55 (dddd,  $J$  = 36.1, 24.6, 14.8, 8.4 Hz, 15H), 0.90 (s, 8H).

$^{13}\text{C}$  NMR (101 MHz,  $\text{CDCl}_3$ )  $\delta$  221.0, 210.1, 207.2, 171.4, 148.4, 138.1, 138.0, 137.5, 126.5, 126.4, 121.5, 121.5, 121.4, 121.4, 118.7, 118.6, 75.4, 68.2, 60.4, 50.4, 47.9, 44.1, 37.9, 35.9, 31.5, 31.0, 29.4, 28.7, 26.3, 25.7, 21.6, 13.8.

HRMS TOF MS  $\text{ES}^+$  (ESI):  $m/z$  calcd. for  $\text{C}_{44}\text{H}_{52}\text{O}_8\text{Na}$ :  $[\text{M}+\text{Na}^+]$  731.3560, found 731.3537.

IR ATR:  $\nu$  = 3057, 2930, 2862, 1732, 1607, 1493, 1454, 1405, 1373, 1264, 1222, 1208, 1152, 1083, 1008, 904, 820, 732, 701  $\text{cm}^{-1}$ .

**5-(2-ethoxy-5-((3-hydroxy-4-oxopyrrolidin-1-yl)sulfonyl)phenyl)-1-methyl-3-propyl-1,6-dihydro-7H-pyrazolo[4,3-*d*]pyrimidin-7-one (P17b)**

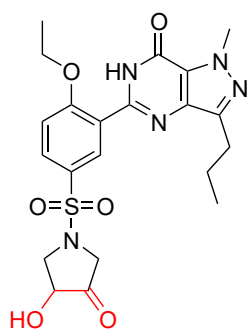

$^1\text{H}$  NMR (400 MHz,  $\text{CDCl}_3$ )  $\delta$  10.9 – 10.8 (m, 1H), 8.9 – 8.6 (m, 1H), 8.0 – 7.8 (m, 1H), 7.1 (dd,  $J$  = 22.0, 8.9 Hz, 1H), 4.4 (ddt,  $J$  = 20.9, 14.0, 7.7 Hz, 3H), 4.2 (d,  $J$  = 6.4 Hz, 4H), 4.2 (s, 1H), 3.5 (d,  $J$  = 6.5 Hz, 1H), 3.3 – 3.2 (m, 1H), 2.9 (d,  $J$  = 7.1 Hz, 2H), 1.9 – 1.8 (m, 2H), 1.6 (d,  $J$  = 6.3 Hz, 3H), 1.0 (t,  $J$  = 7.1 Hz, 3H).

$^{13}\text{C}$  NMR (101 MHz,  $\text{CDCl}_3$ )  $\delta$  202.2, 159.4, 153.7, 146.9, 138.3, 130.7, 113.0, 77.3, 77.3, 77.0, 76.7, 70.7, 66.0, 52.2, 38.2, 27.6, 22.3, 14.5, 14.5, 14.0.

HRMS TOF MS  $\text{ESI}^-$  (ESI):  $m/z$  calcd. for  $\text{C}_{21}\text{H}_{24}\text{N}_5\text{O}_6\text{S}$ :  $[\text{M}-\text{H}^-]$  474.1447, found 474.1438.

IR ATR:  $\nu$  = 3322, 3054, 2986, 2963, 2937, 2873, 1697, 1599, 1584, 1563, 1489, 1470, 1394, 1347, 1264, 1164, 1029, 732, 702, 653, 586  $\text{cm}^{-1}$ .

# $^1\text{H}$ and $^{13}\text{C}$ NMR Spectra

## Diethyl 3-hydroxy-4-oxocyclopentane-1,1-dicarboxylate

OZ\_uDEDAM\_F1\_20171115\_01/PROTON\_01.fid/fid  
Solvent: cdcl3, Scans: 32, Relaxation: 5.0000

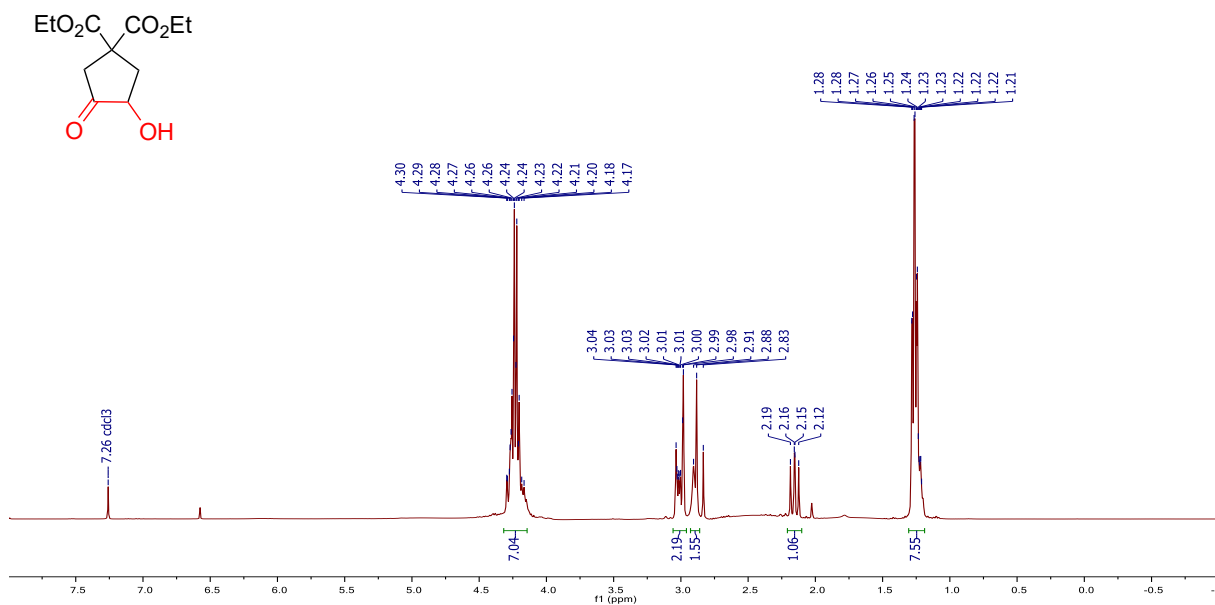

OZ\_uDEDAM\_F1\_20171115\_01/CARBON\_01.fid/fid  
Solvent: cdcl3, Scans: 256, Relaxation: 5.0000

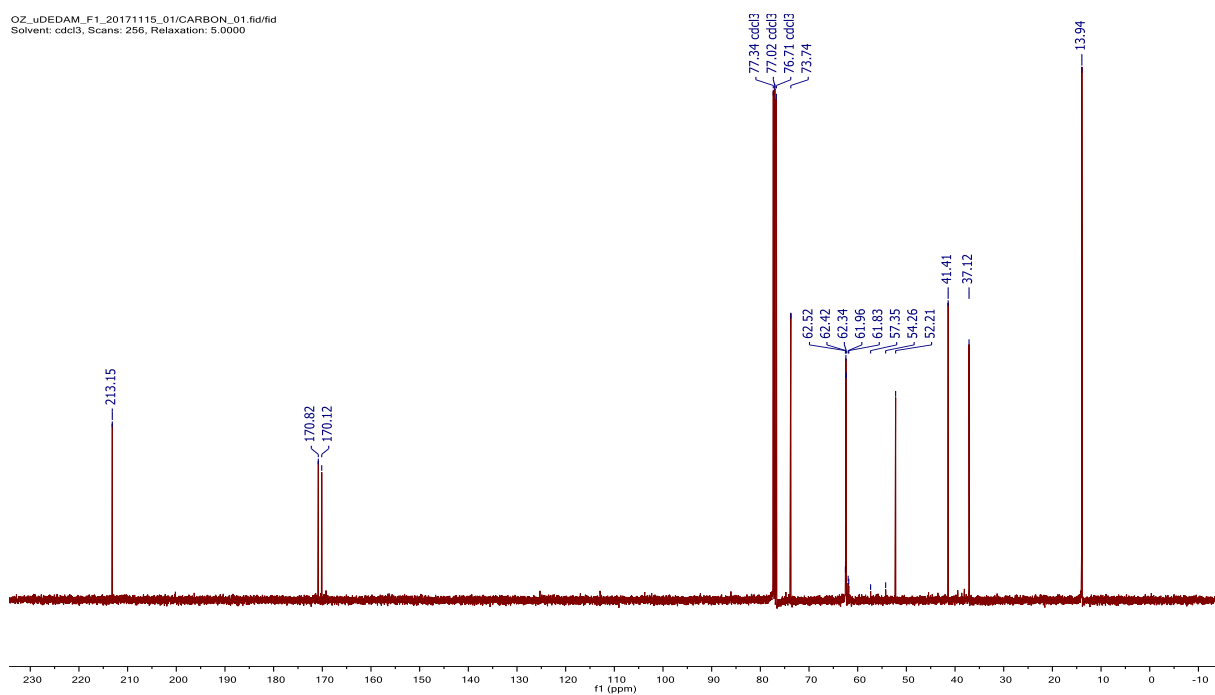



# 1,1'-(3-hydroxy-4-oxocyclopentane-1,1-diyl)bis(ethan-1-one)

MPA\_u\_DAA\_f2\_20181019\_01/PROTON\_01.fid/fid  
Solvent: cdcl3, Scans: 32, Relaxation: 5.0000

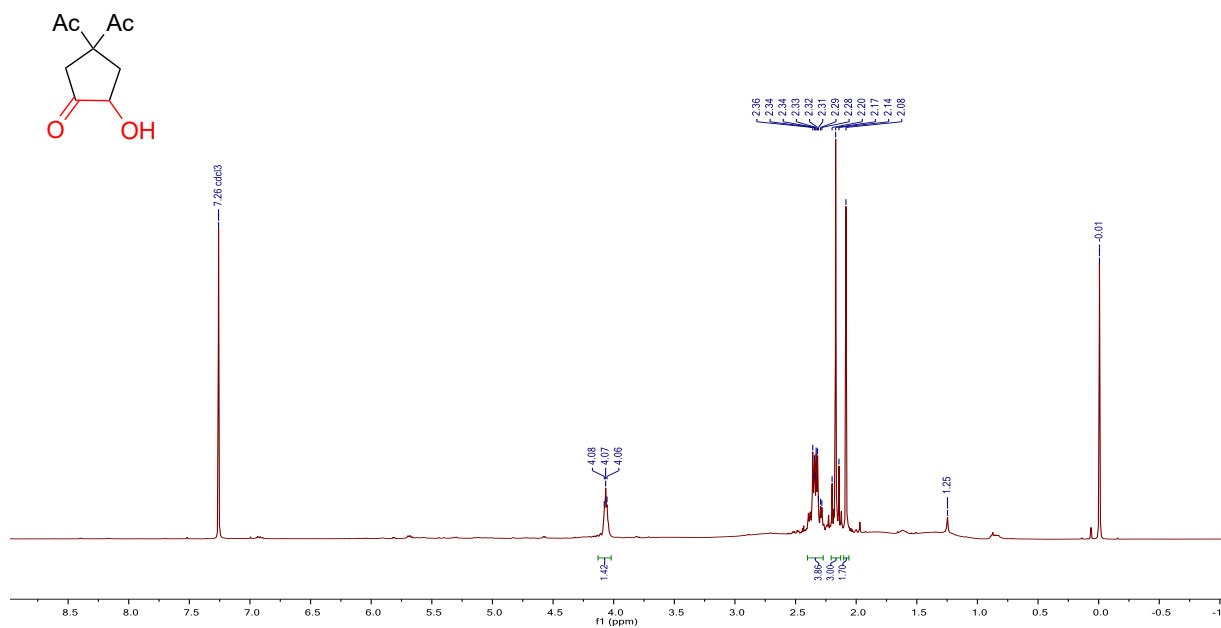

MPA\_u\_DAA\_f2\_20181019\_01/CARBON\_01.fid/fid  
Solvent: cdcl3, Scans: 256, Relaxation: 2.0000

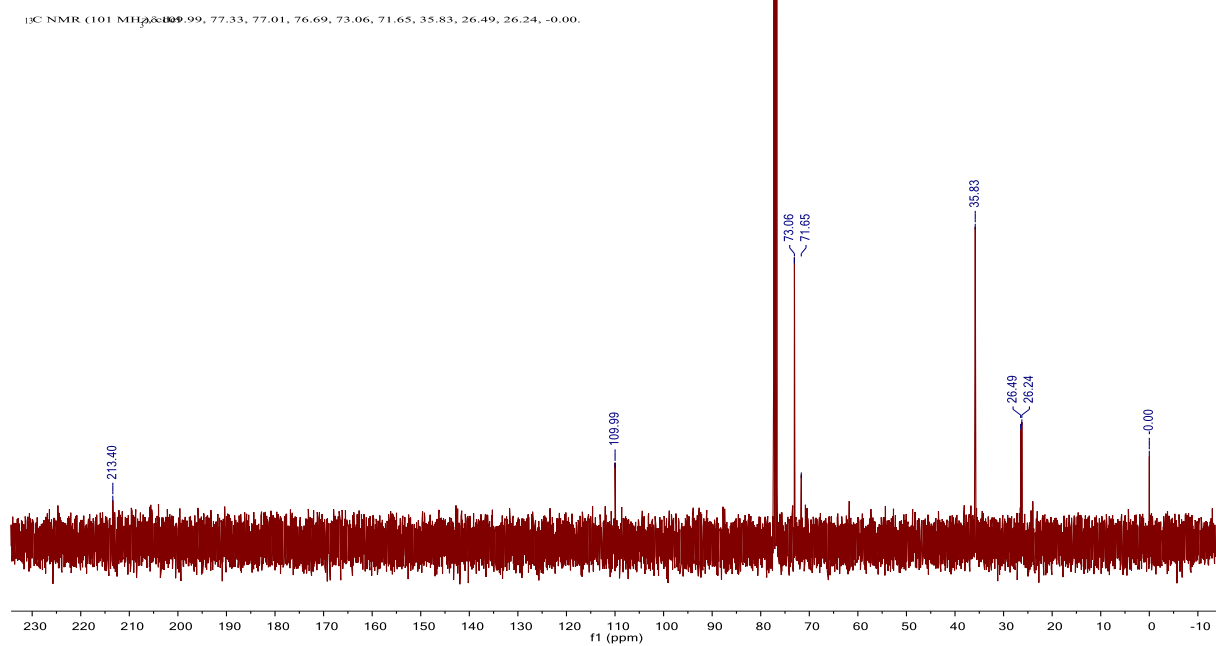

# 3-hydroxyspiro[cyclopentane-1,2'-indene]-1',3',4-trione

MPA\_uA\_f1\_20181220\_01/PROTON\_01.fid/fid  
Solvent: cdcl3, Scans: 32, Relaxation: 5.0000

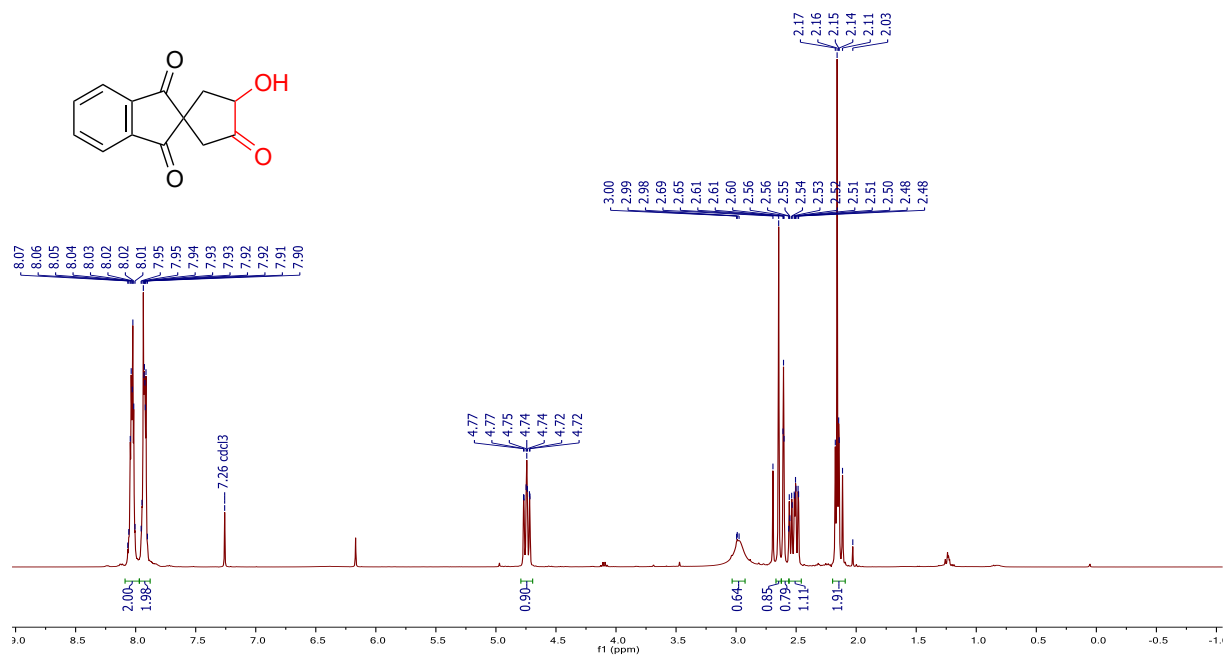

MPA\_uA\_f1\_20181220\_01/CARBON\_01.fid/fid  
Solvent: cdcl3, Scans: 256, Relaxation: 2.0000

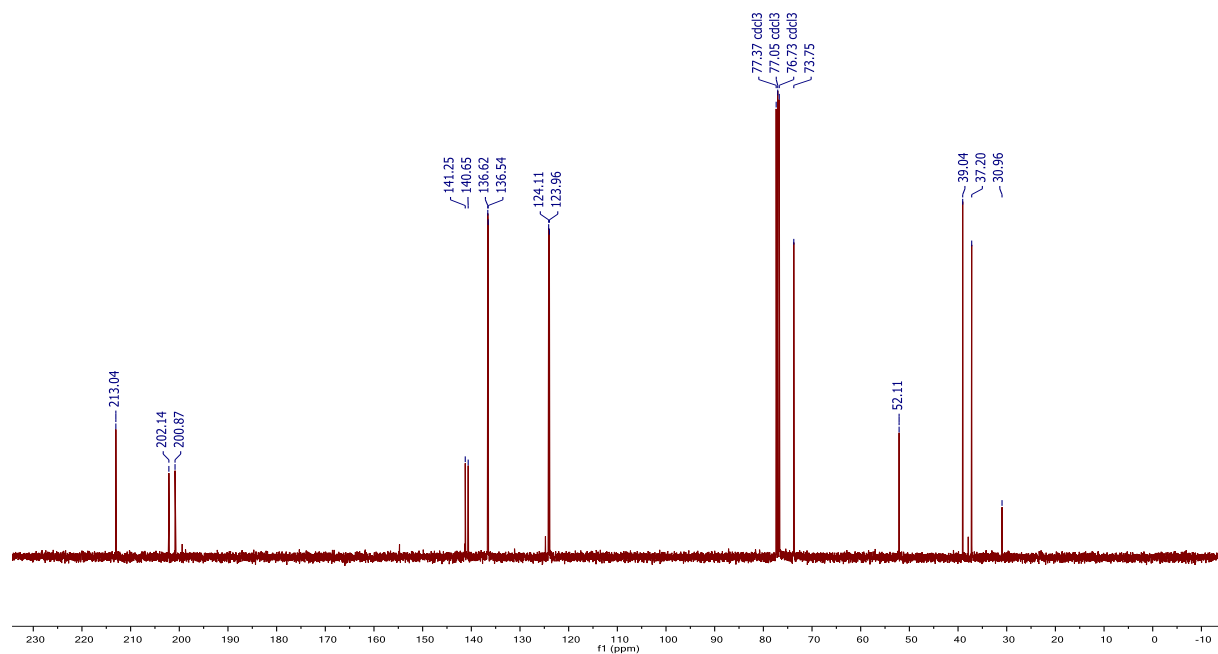

# 5-benzyl-2,5-dihydroxycycloheptan-1-one

MPA\_u\_BEN\_F2\_20181012\_01/PROTON\_01.fid/fid  
Solvent: cdcl3, Scans: 16, Relaxation: 5.0000

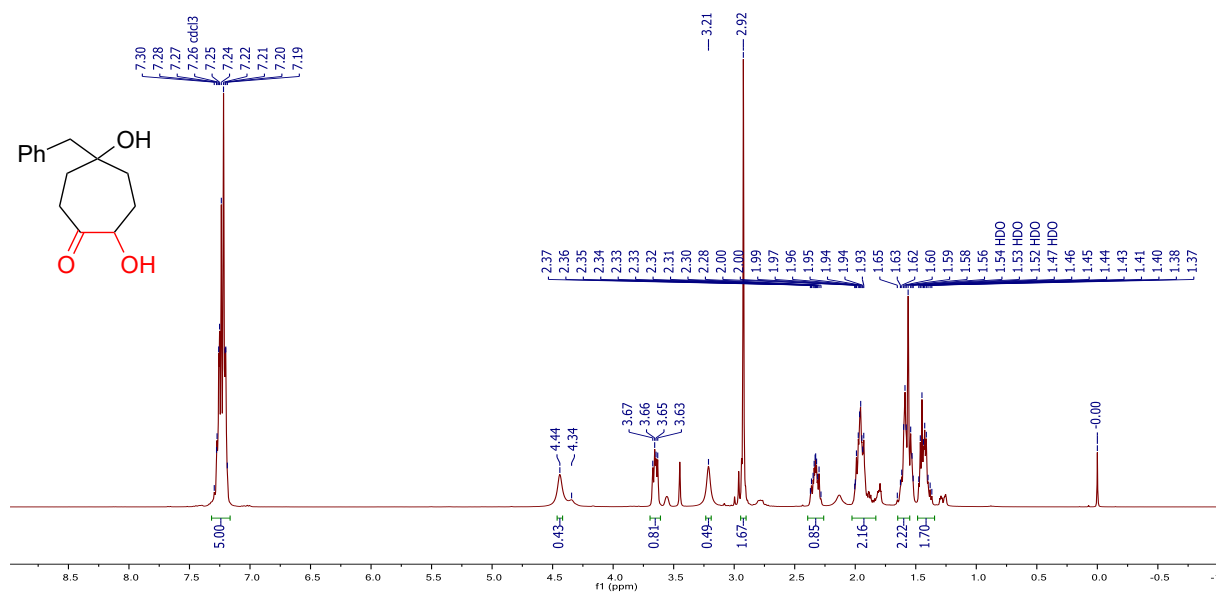

MPA\_u\_BEN\_F2\_20181012\_01/CARBON\_01.fid/fid  
Solvent: cdcl3, Scans: 256, Relaxation: 2.0000

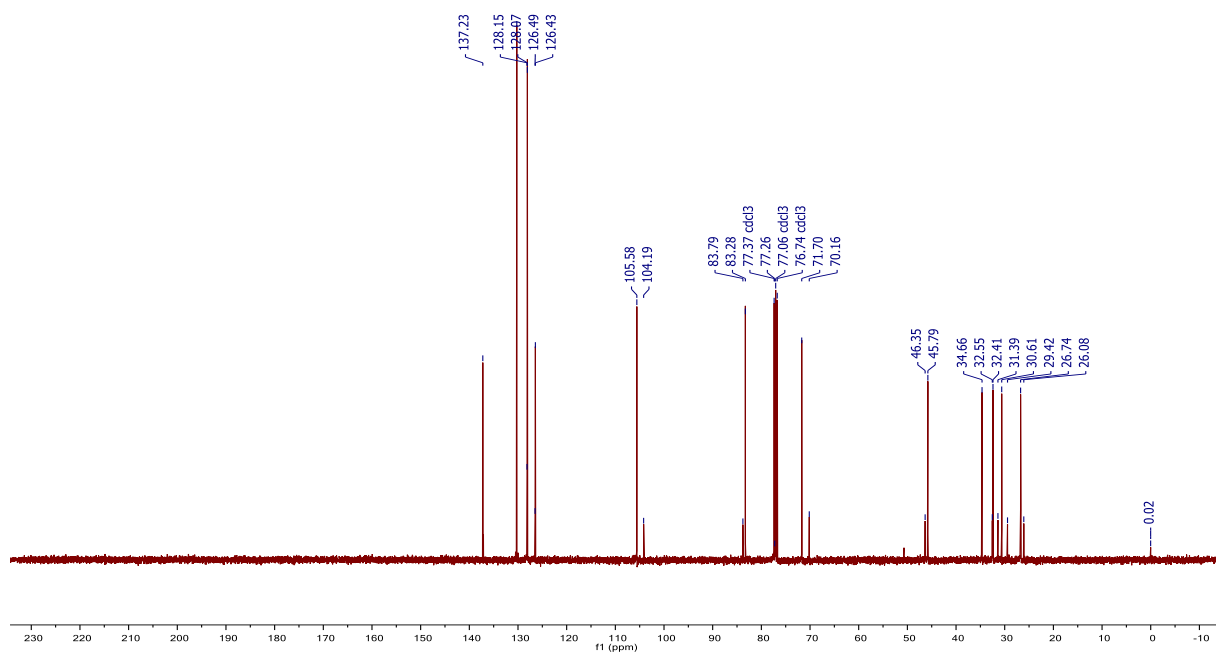

# 5-hydroxy-1-tosylazepan-4-one

MPA\_uDATA7\_AquaMet\_bezSC\_20181009\_01/PROTON\_01.fid/fid  
Solvent: cdc13, Scans: 32, Relaxation: 2.0000

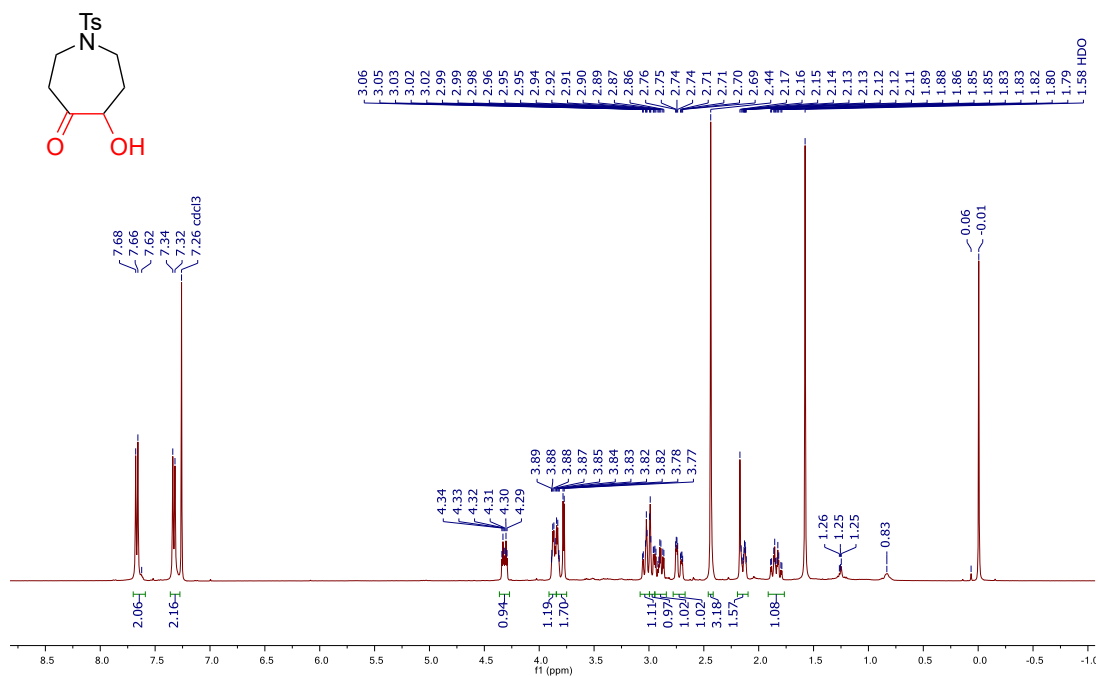

MPA\_uDataC7\_20210518\_01/CARBON\_01.fid/fid  
Solvent: cdc13, Scans: 1000, Relaxation: 1.0000  
MPA\_uDataC7

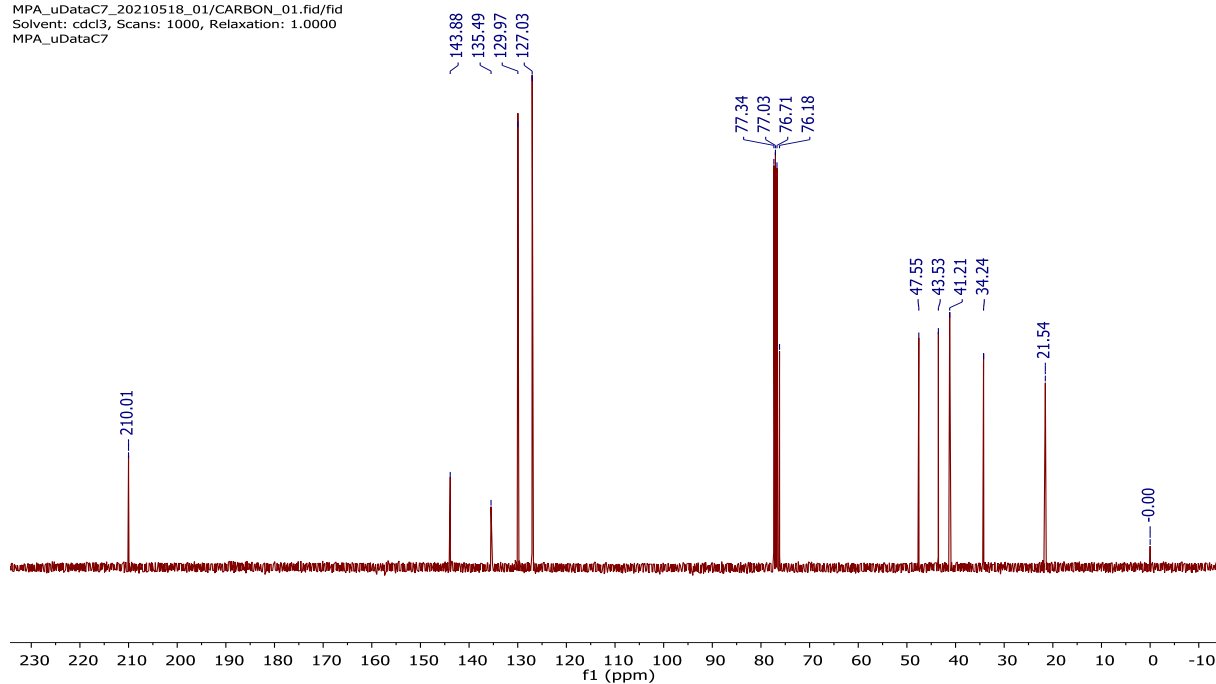

# 6-hydroxy-16-methyloxacyclohexadecane-2,5-dione

MPA92\_u\_makro\_ol\_i2\_2\_20180522\_01/PROTON\_01.fid/fid  
Solvent: cd3od, Scans: 32, Relaxation: 1.0000

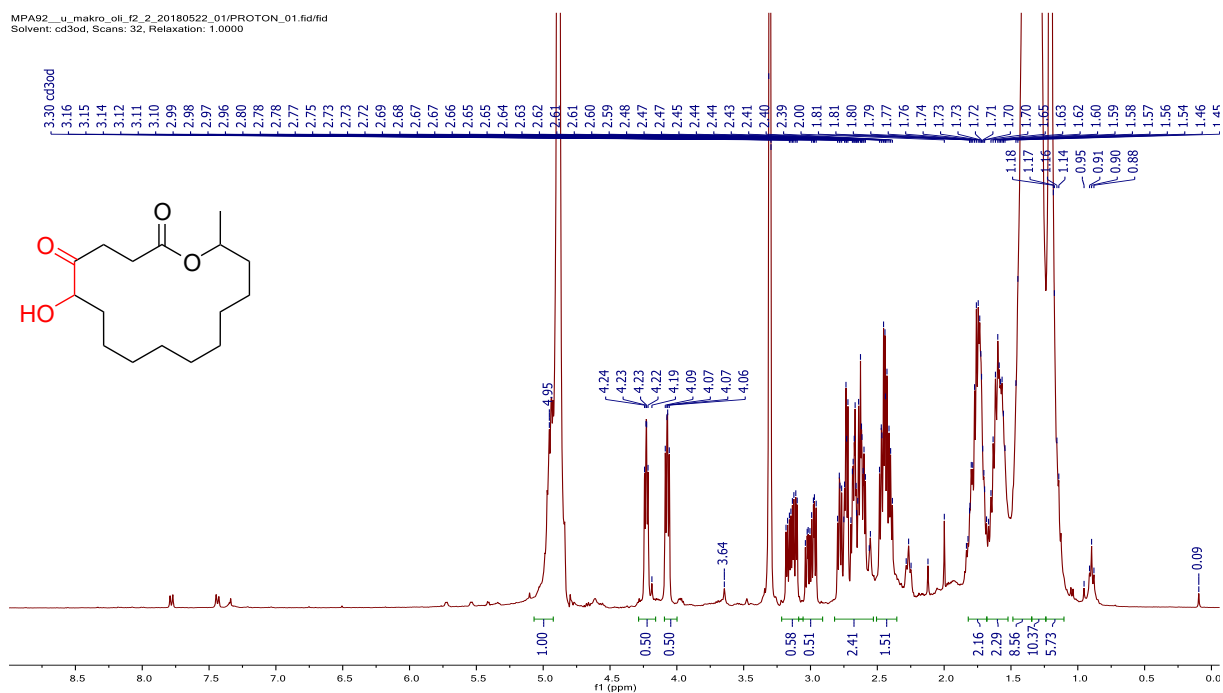

MPA92\_u\_makro\_ol\_i2\_2\_20180522\_01/CARBON\_01.fid/fid  
Solvent: cd3od, Scans: 5000, Relaxation: 1.0000

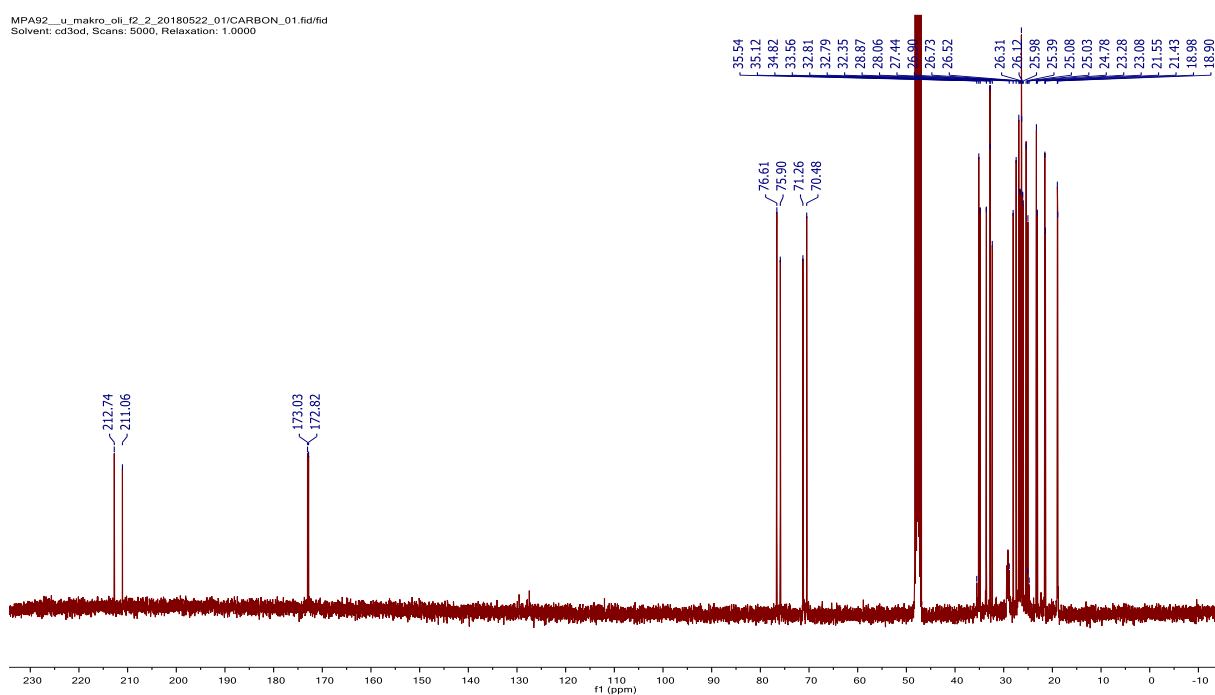

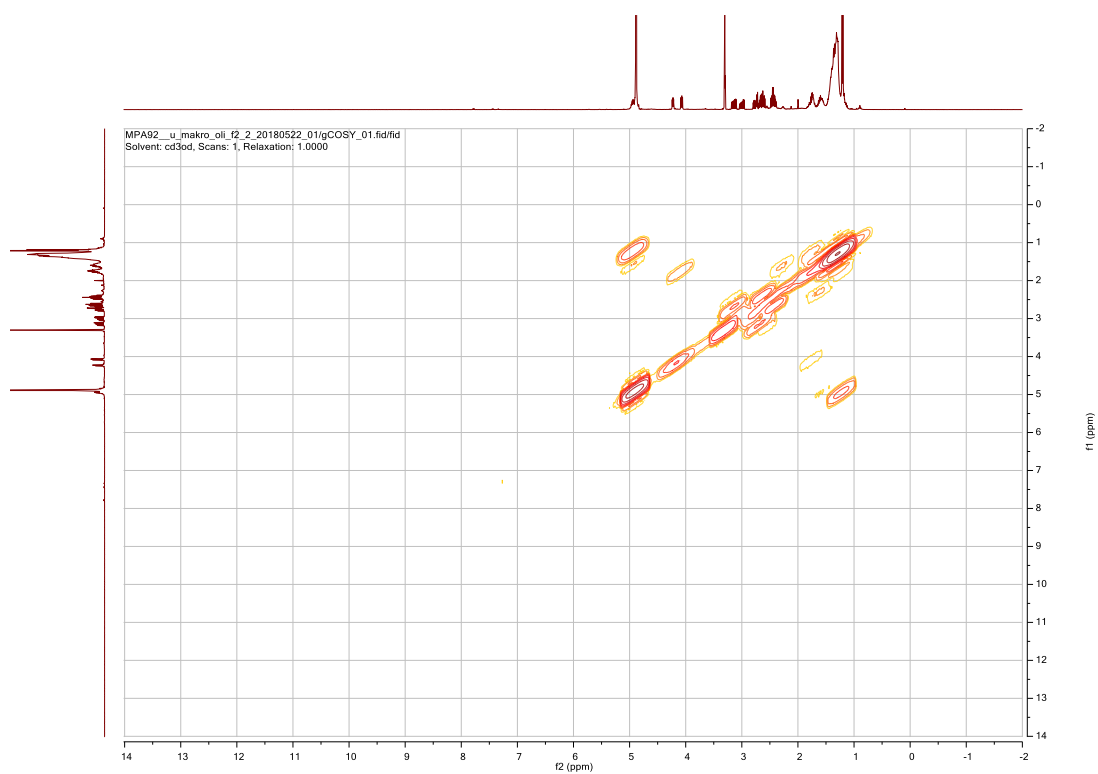

# 5-hydroxy-16-methyloxacyclohexadecane-2,6-dione

MPA92\_u\_makro\_oli\_f1\_2\_20180522\_01/PROTON\_01.fid/fid  
Solvent: cd3od, Scans: 32, Relaxation: 1.0000

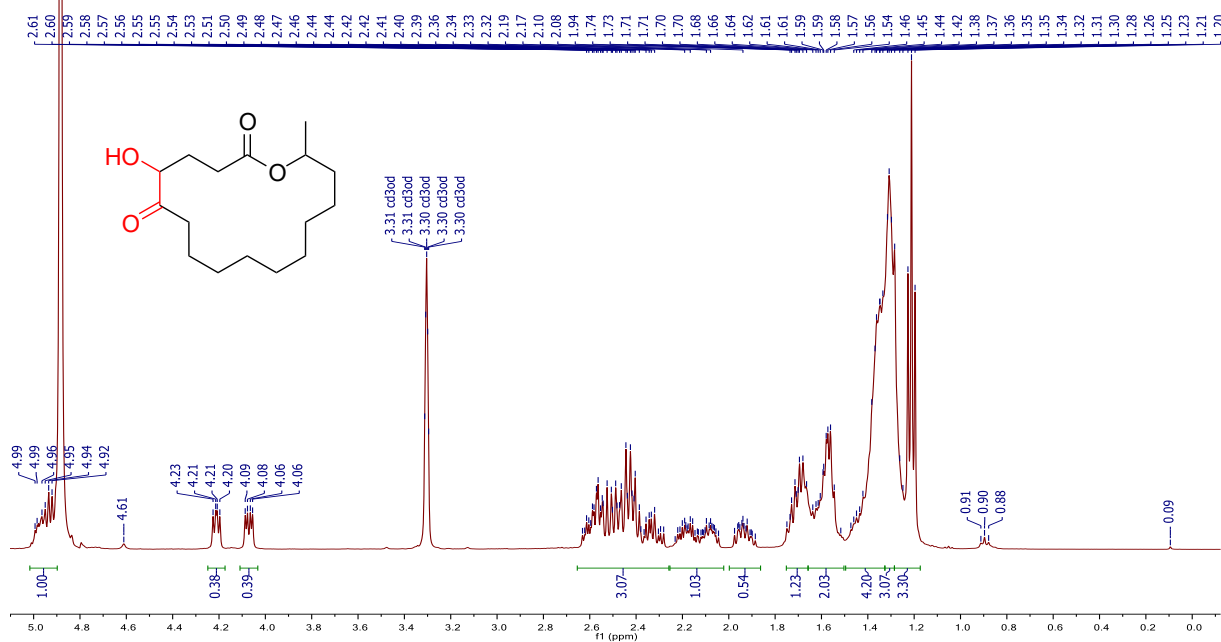

MPA92\_u\_makro\_oli\_f1\_2\_20180522\_01/CARBON\_01.fid/fid  
Solvent: cd3od, Scans: 5000, Relaxation: 1.0000

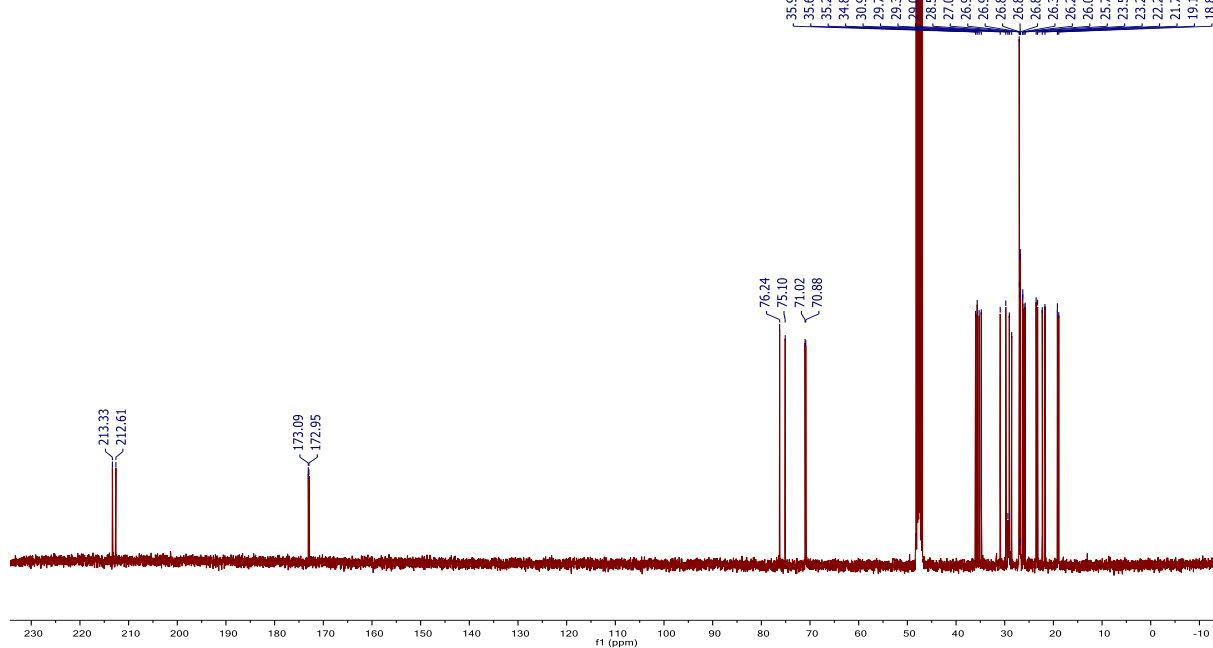

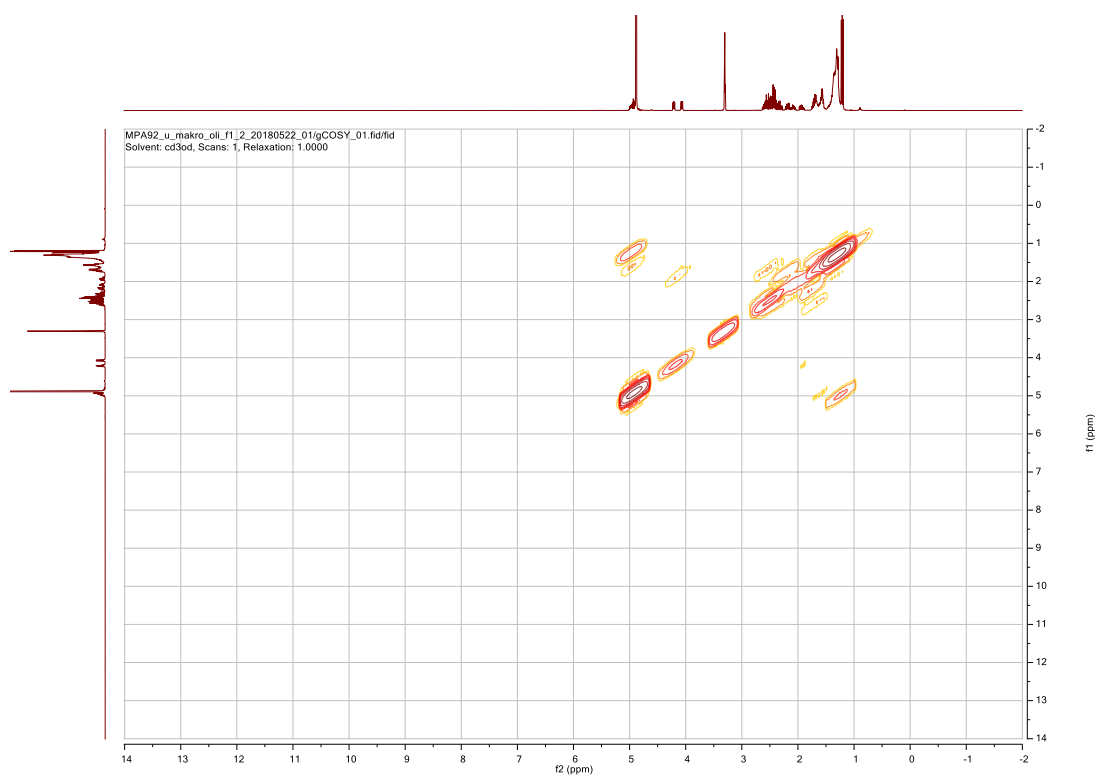



# 11-hydroxyoxacyclohexadecane-2,12-dione and 12-hydroxyoxacyclohexadecane-2,11-dione

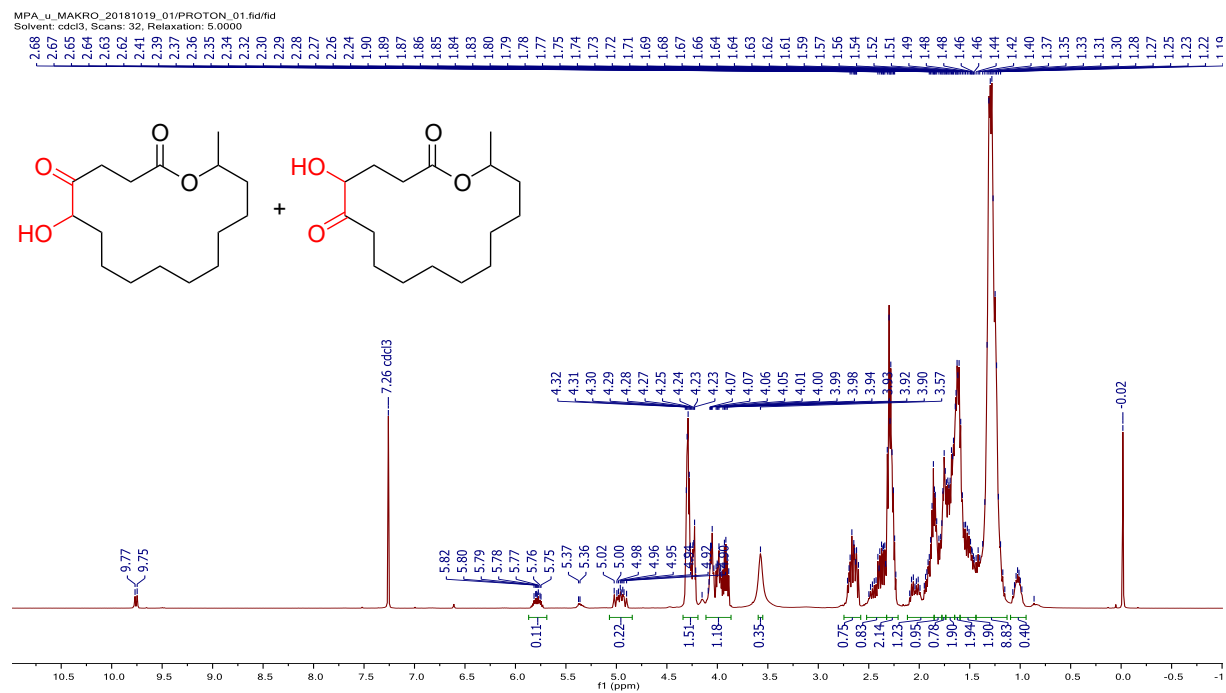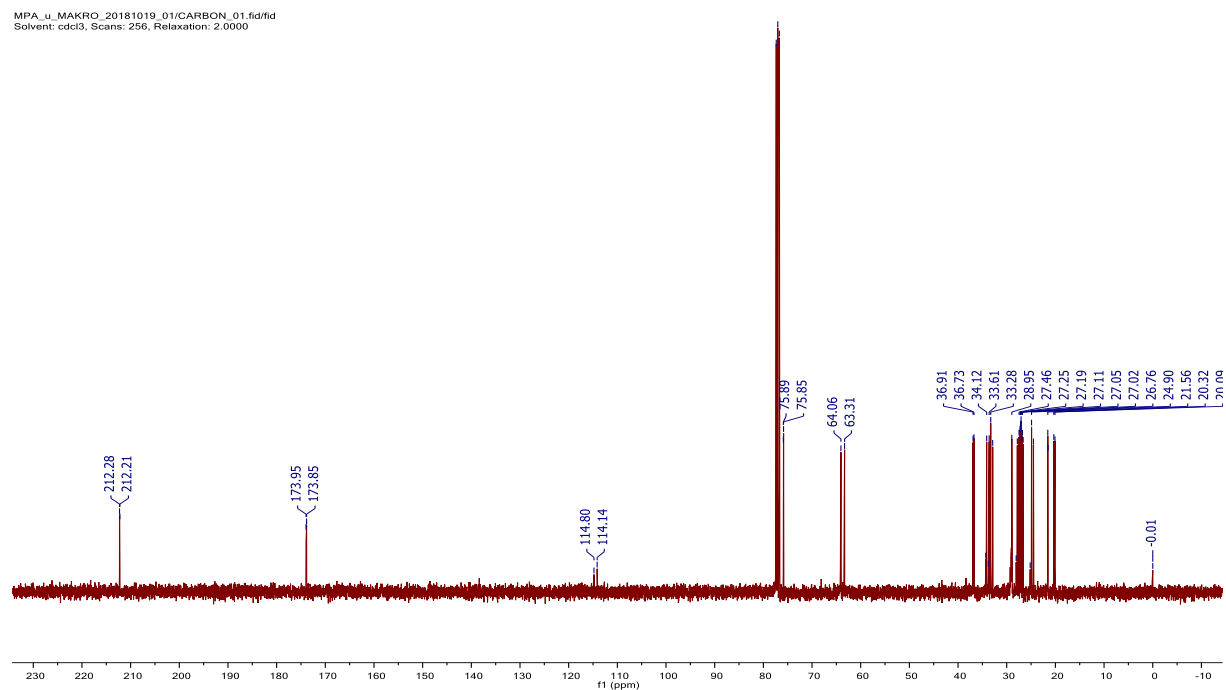

# 10-hydroxyoctadecan-9-one

MPA\_undecenF1\_20181019\_01/PROTON\_01.fid/tid  
Solvent: cdcl3, Scans: 32, Relaxation: 5.0000

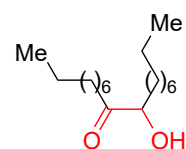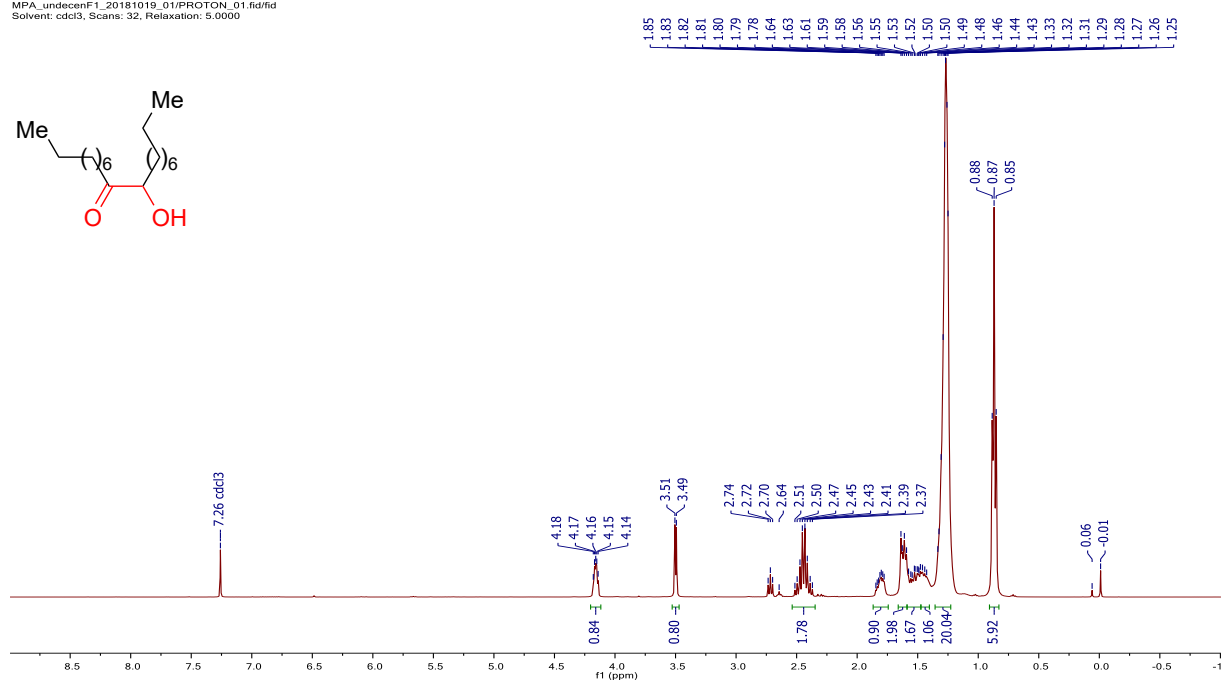

MPA\_undecenF1\_20181019\_01/CARBON\_01.fid/tid  
Solvent: cdcl3, Scans: 256, Relaxation: 2.0000

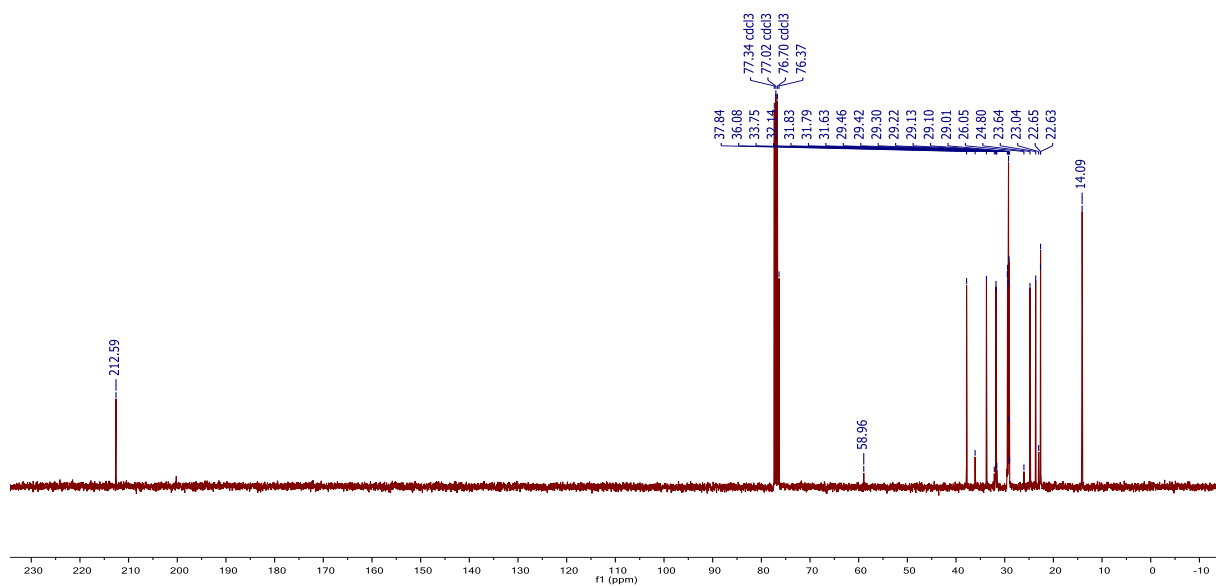

# 6-hydroxydecane-2,5,9-trione

MPA\_u\_KETON\_f1\_20181019\_01/PROTON\_01.fid/fid  
Solvent: cdcl3, Scans: 32, Relaxation: 5.0000

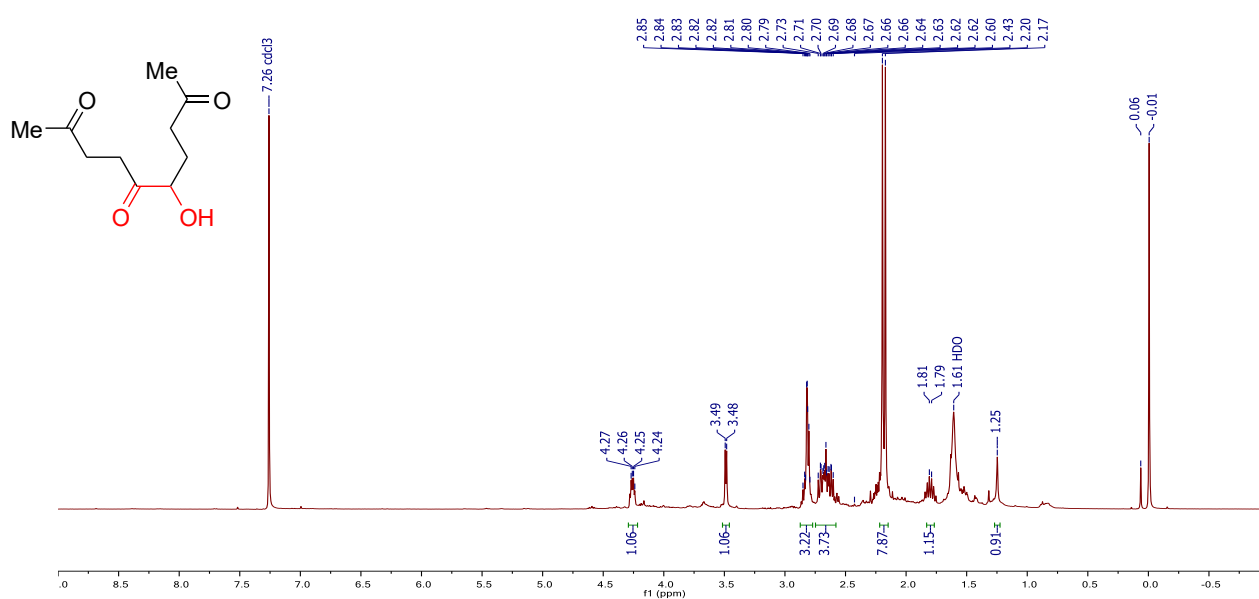

MPA\_u\_KETON\_f1\_20181019\_01/CARBON\_01.fid/fid  
Solvent: cdcl3, Scans: 256, Relaxation: 2.0000

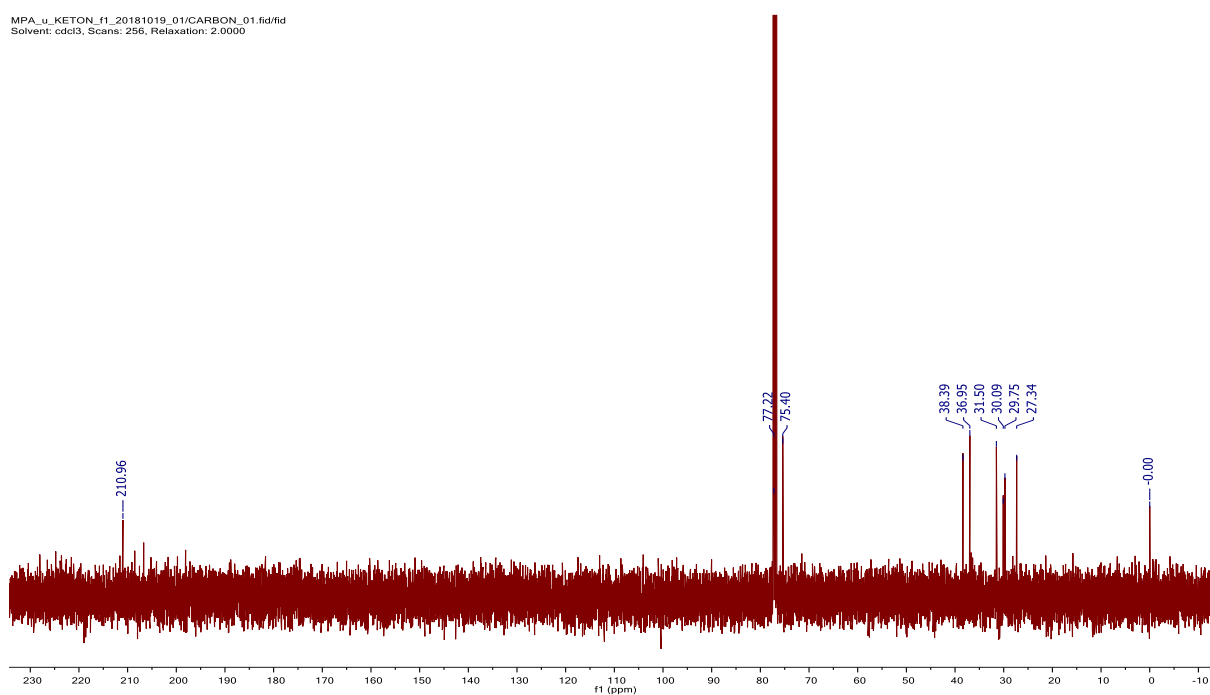

# 7-hydroxy-1,12-dimethoxydodecan-6-one

MPA\_u\_Ester\_f1\_20181019\_01/PROTON\_01.fid/fid  
Solvent: cdcl3, Scans: 32, Relaxation: 5.0000

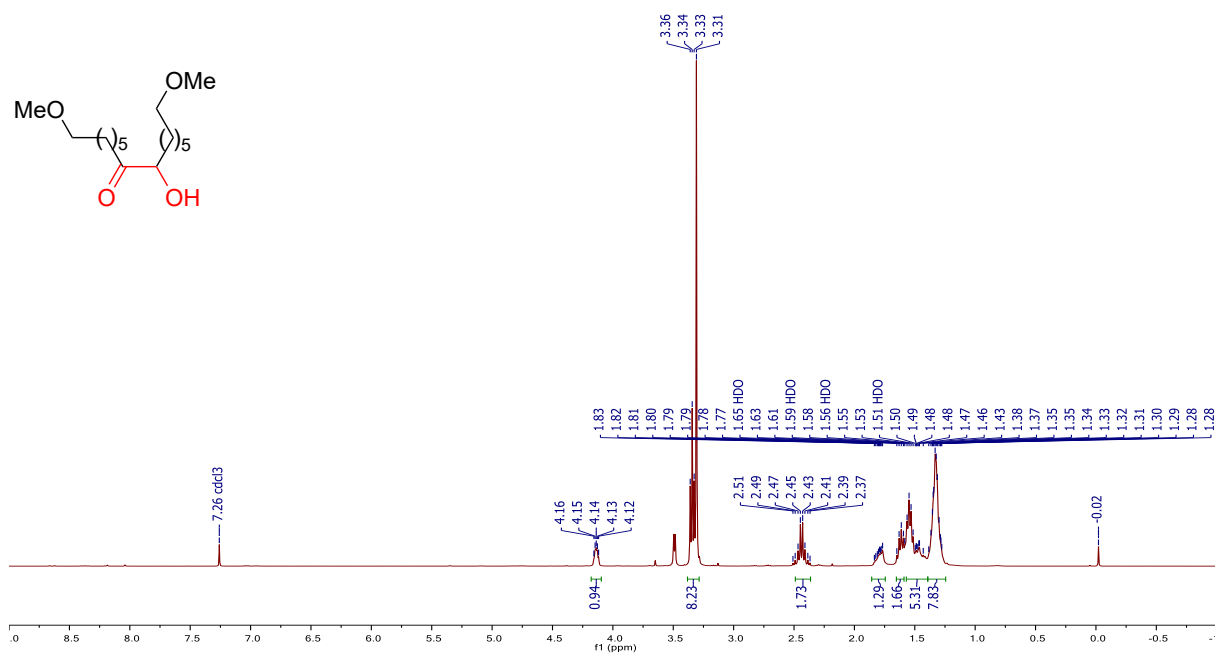

MPA\_u\_Ester\_f1\_20181019\_01/CARBON\_01.fid/fid  
Solvent: cdcl3, Scans: 256, Relaxation: 2.0000

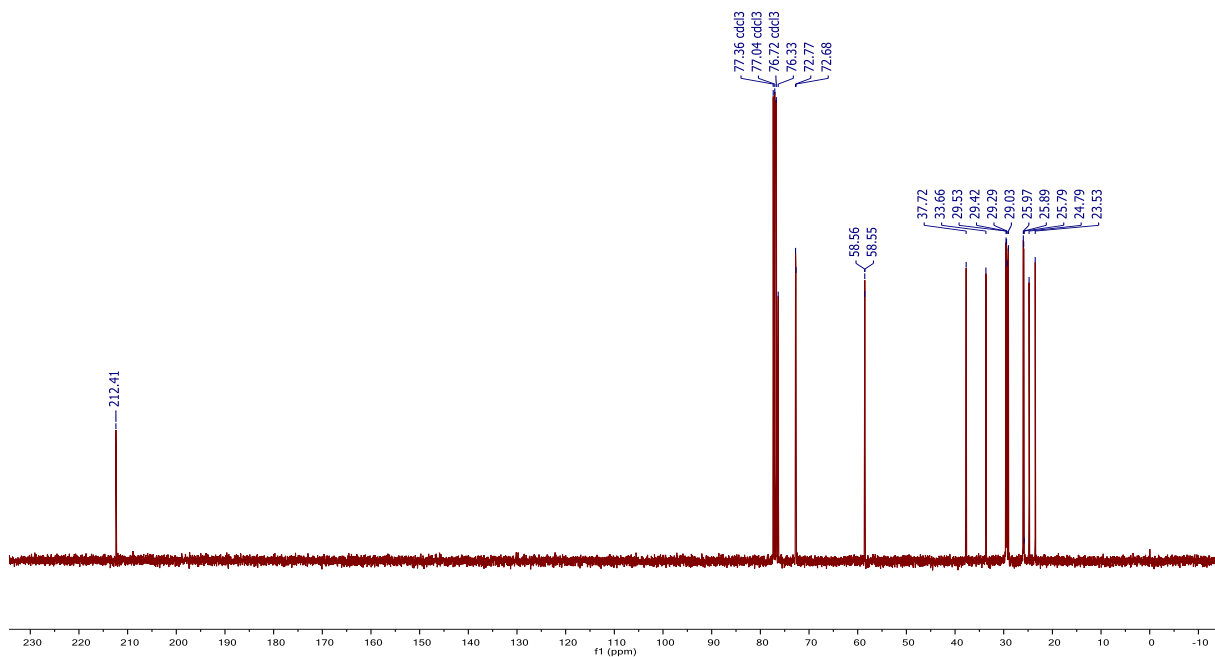

# Dimethyl 2,19-dihydroxy-10-methyl-11-oxoicosanedioate

OZ\_u-9-DAME\_20180828\_01/PROTON\_01.fid/fid  
Solvent: cdcl3, Scans: 64, Relaxation: 1.0000

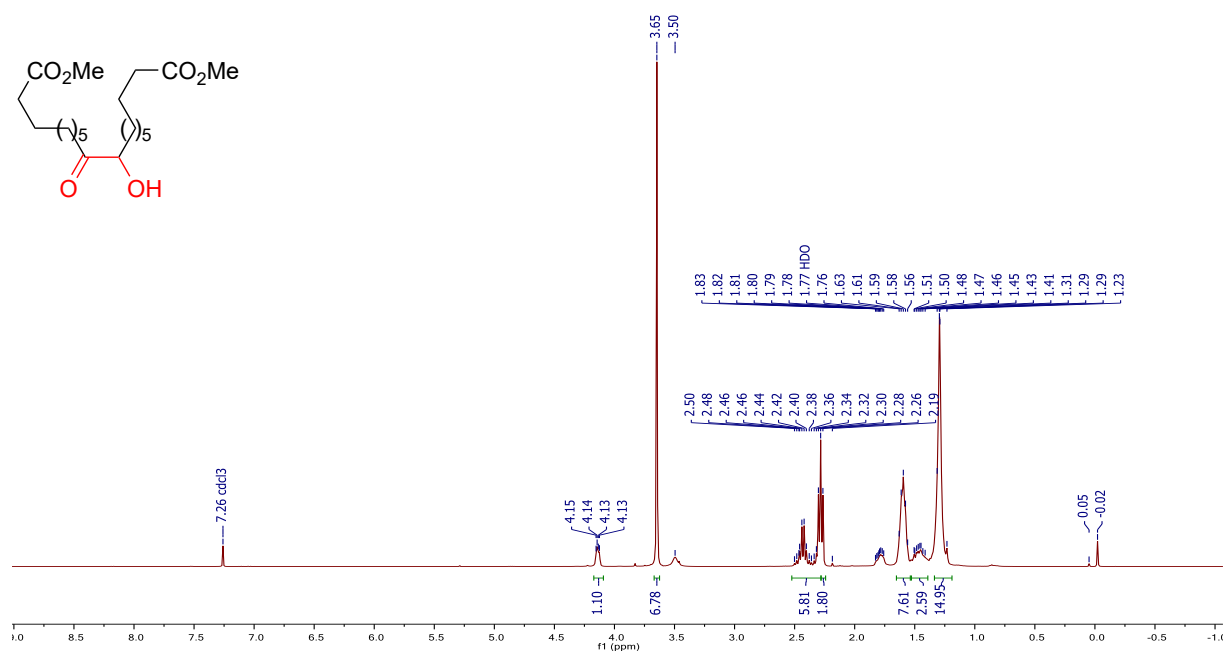

OZ\_u-9-DAME\_20180828\_01/CARBON\_01.fid/fid  
Solvent: cdcl3, Scans: 512, Relaxation: 1.0000

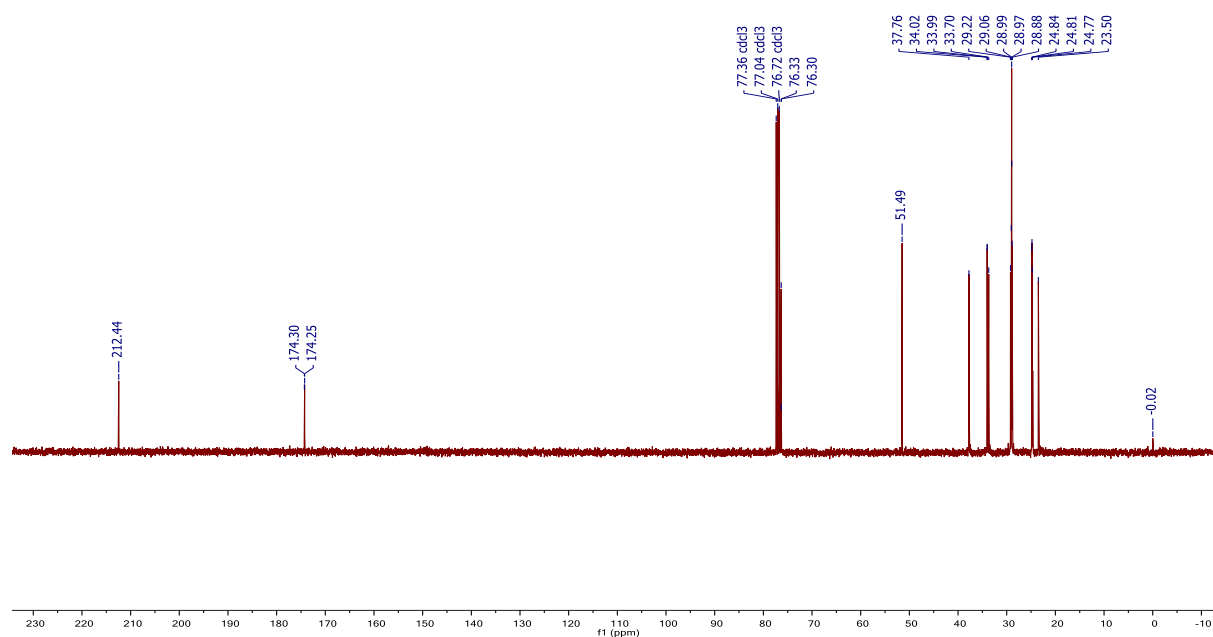

## 2-hydroxy-1,2-diphenylethan-1-one

OZ\_u-styren\_2\_20180906\_01/PROTON\_01.fid/fid  
Solvent: cdcl3, Scans: 64, Relaxation: 5.0000

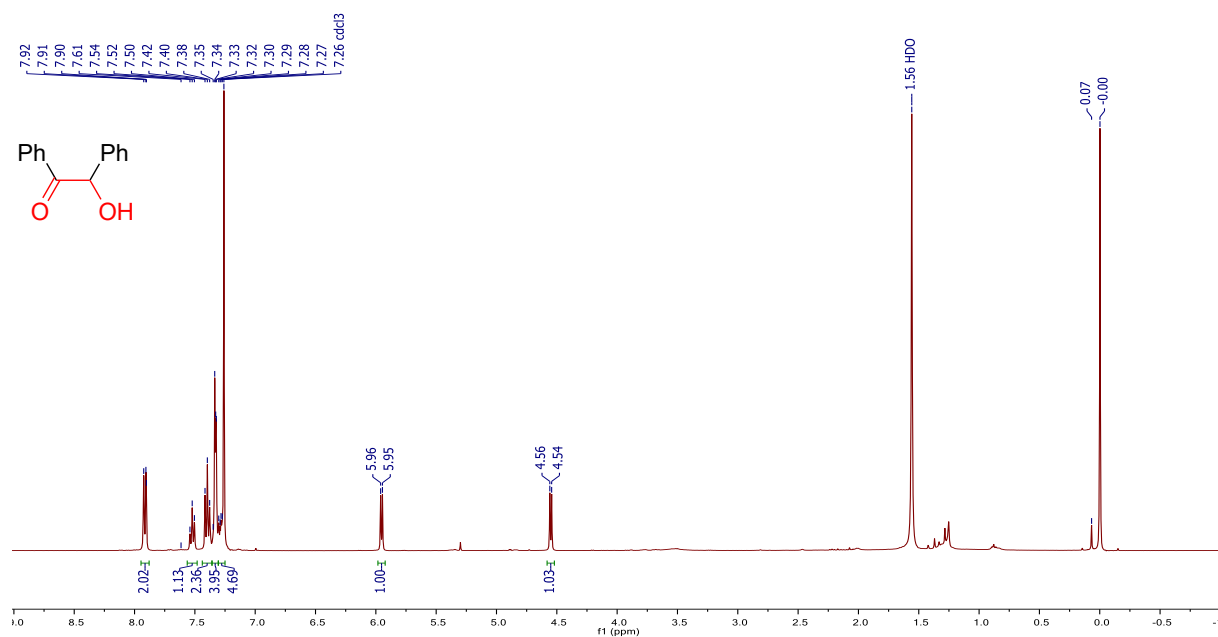

MPA\_uStyren\_20210518\_01/CARBON\_01.fid/fid  
Solvent: cdcl3, Scans: 1000, Relaxation: 1.0000  
MPA\_uStyren

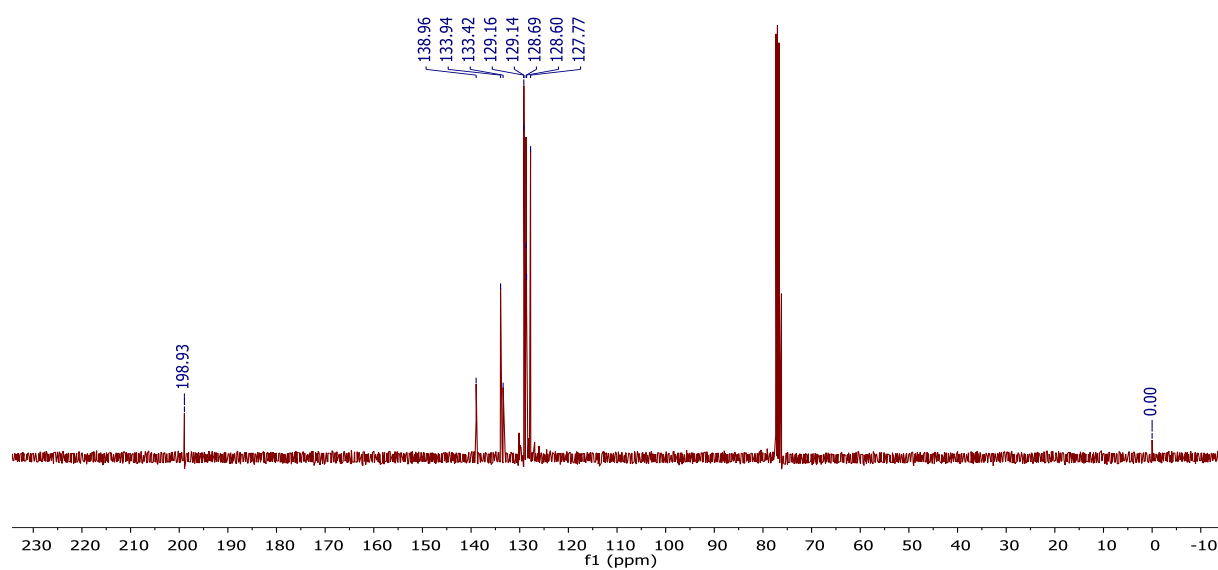

# 3-hydroxy-1,4-diphenylbutan-2-one

MPA\_u-allylbenzene\_f3\_20180727\_01/PROTON\_01.fid/fid  
Solvent: cdcl3, Scans: 64, Relaxation: 1.0000

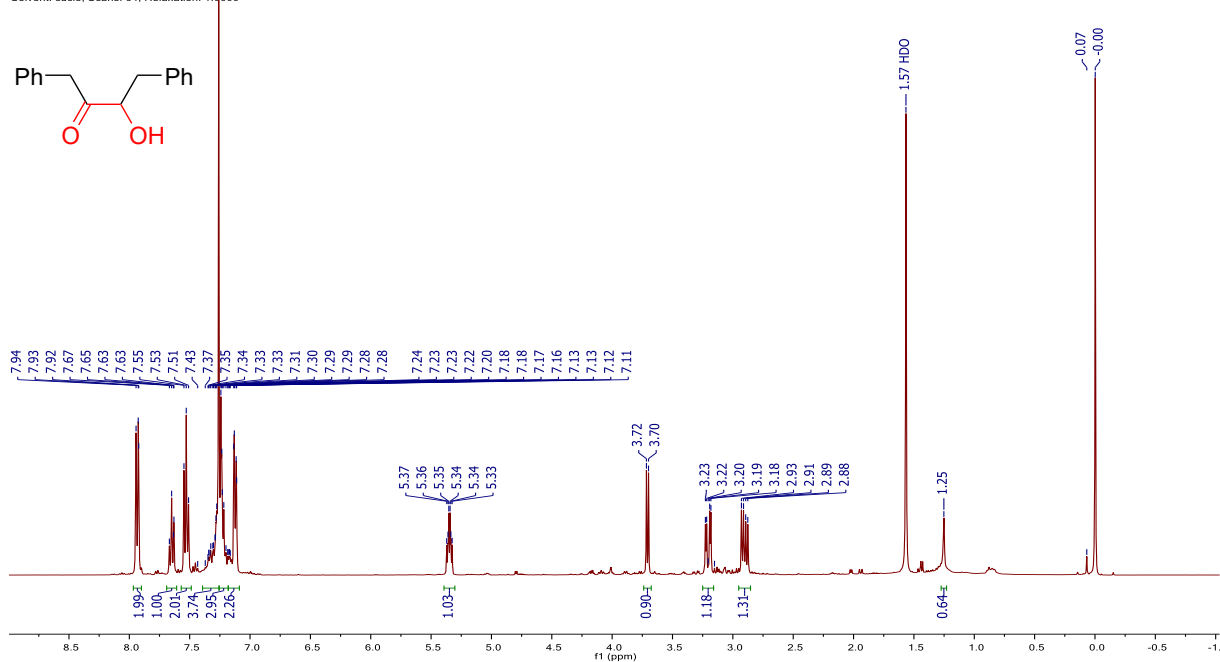

MPA\_u-allylbenzene\_f3\_20180727\_01/CARBON\_01.fid/fid  
Solvent: cdcl3, Scans: 512, Relaxation: 1.0000

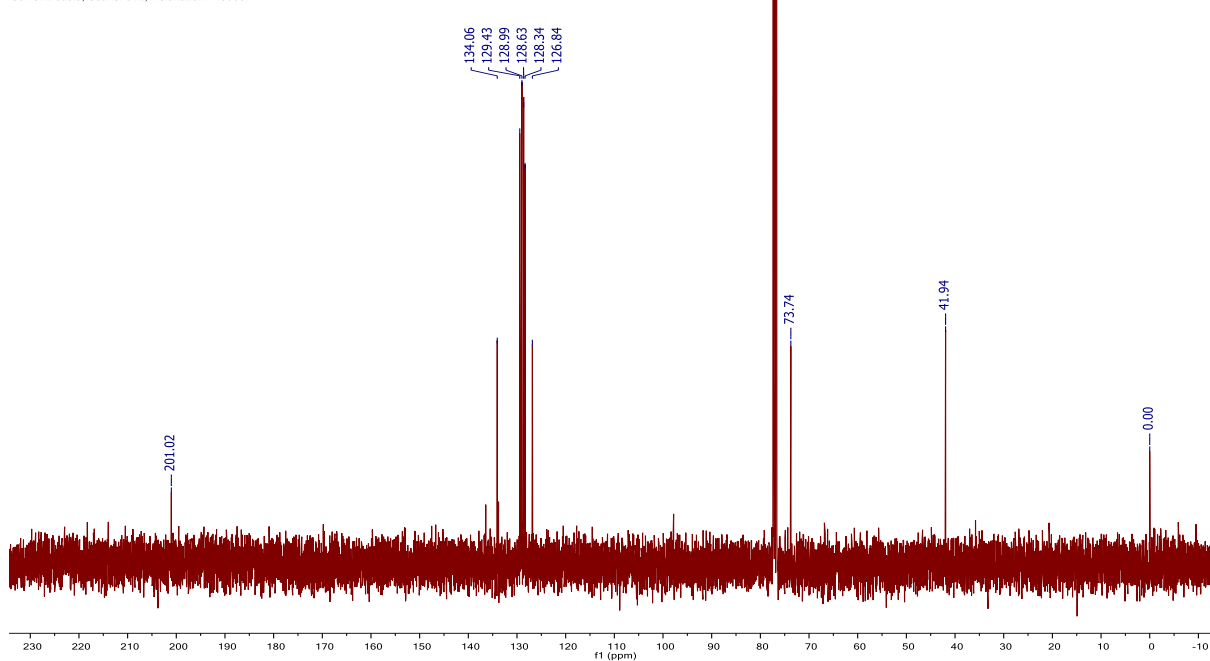

# Dimethyl 5,5'-(2-hydroxy-3-oxobutane-1,4-diyl)bis(2-methoxybenzoate)

MPA\_u\_Eugenol\_20210513\_01/PROTON\_01.fid/fid  
Solvent: cdcl3, Scans: 32, Relaxation: 10.0000

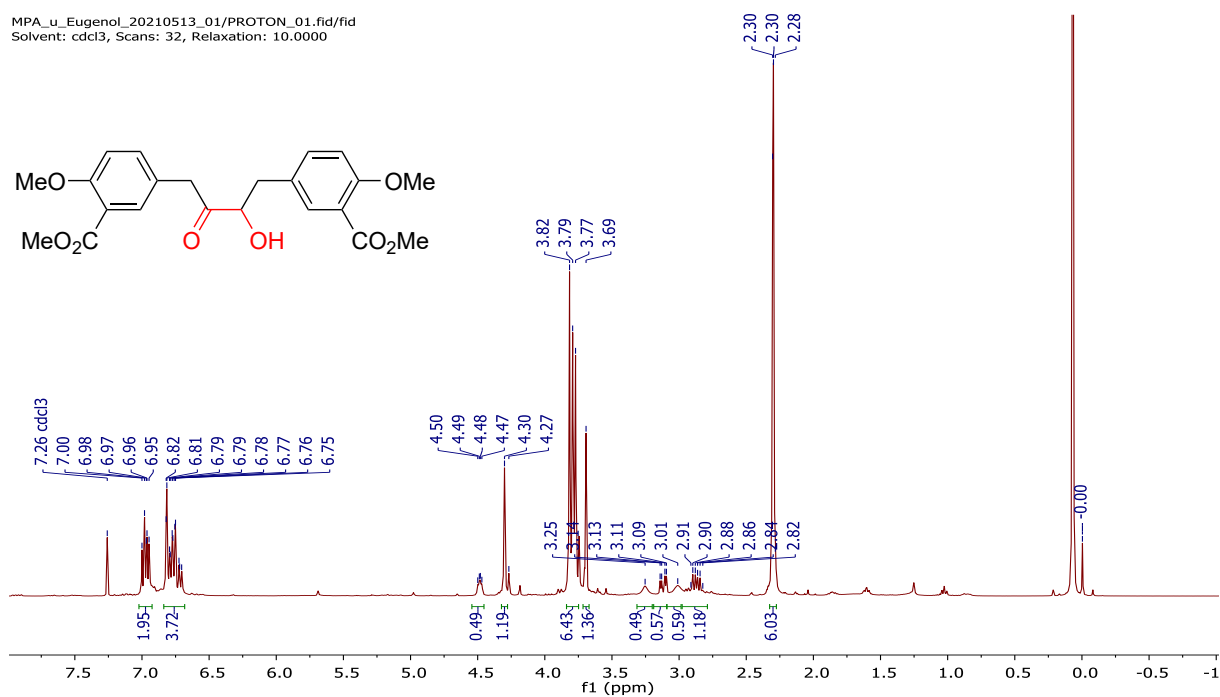

MPA\_u\_Eugenol\_20210513\_01/CARBON\_01.fid/fid  
Solvent: cdcl3, Scans: 256, Relaxation: 1.0000

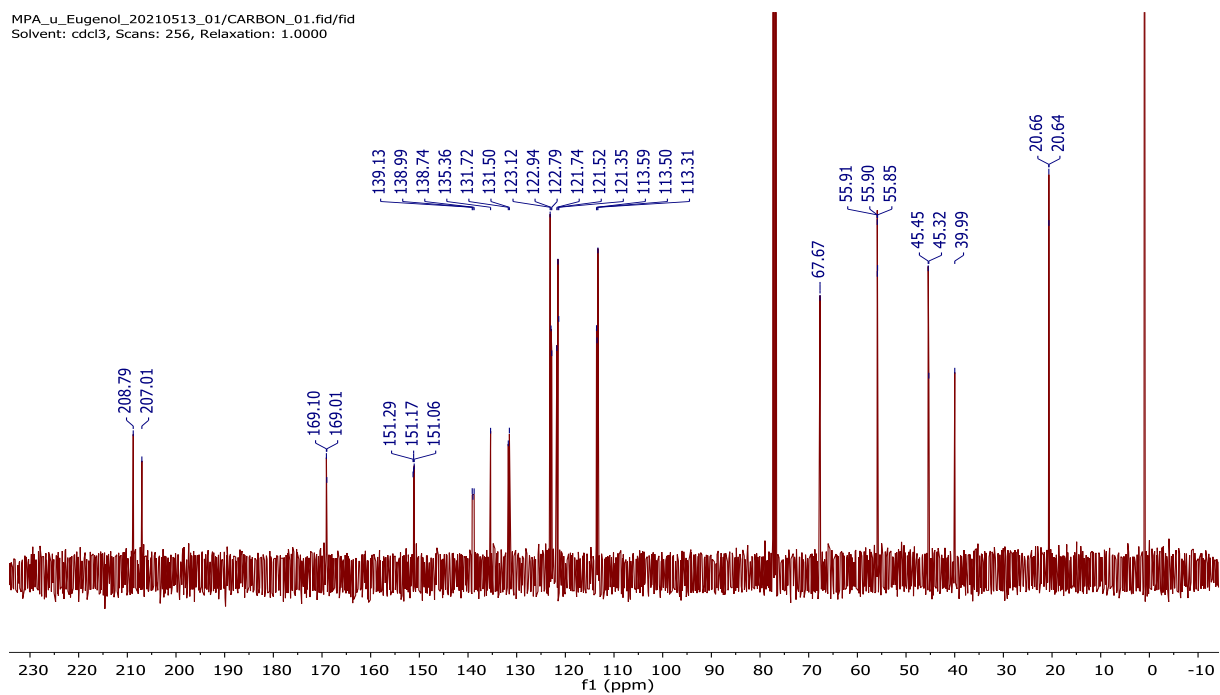



# Bis((9*R*,13*R*,14*R*)-13-methyl-17-oxo-7,8,9,11,12,13,14,15,16,17-decahydro-6*H*-cyclopenta[*a*]phenanthren-3-yl) 3-hydroxy-4-oxohexanedioate

MPA\_uESTRON\_20210326\_01/PROTON\_01.fid/fid  
Solvent: cdcl3, Scans: 32, Relaxation: 5.0000

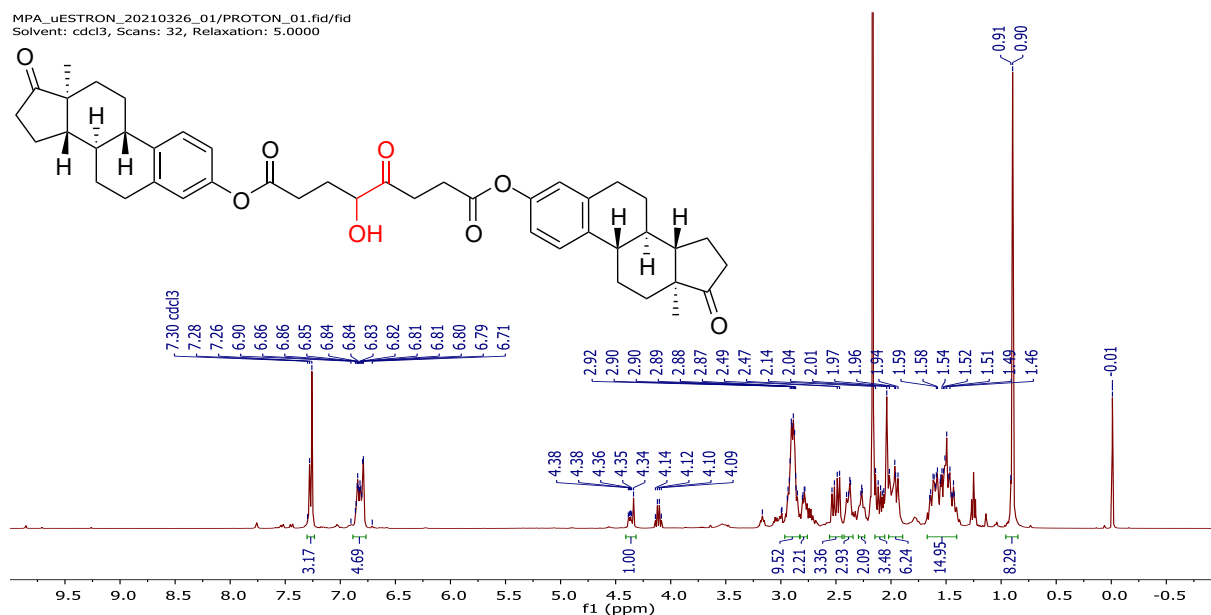

MPA\_uESTRON\_20210326\_01/CARBON\_01.fid/fid  
Solvent: cdcl3, Scans: 512, Relaxation: 1.0000

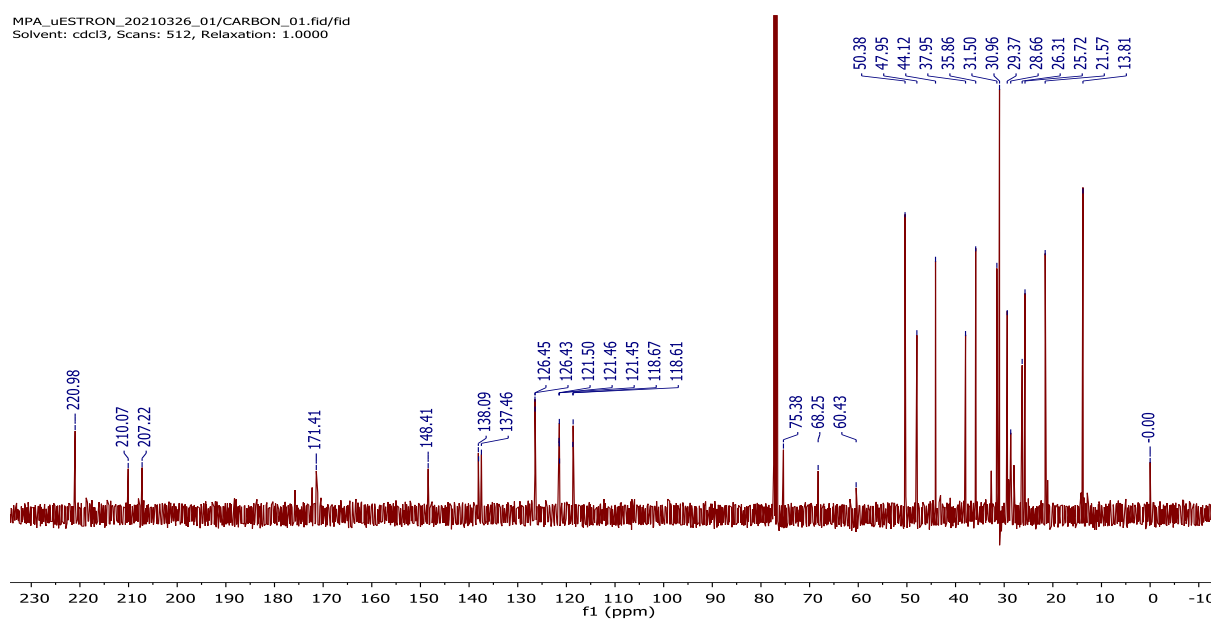

# 5-(2-ethoxy-5-((3-hydroxy-4-oxopyrrolidin-1-yl)sulfonyl)phenyl)-1-methyl-3-propyl-1,6-dihydro-7H-pyrazolo[4,3-d]pyrimidin-7-one

MPA\_u\_DiAlliloSil\_20210513\_01/PROTON\_01.fid/fid  
Solvent: cdcl3, Scans: 32, Relaxation: 10.0000

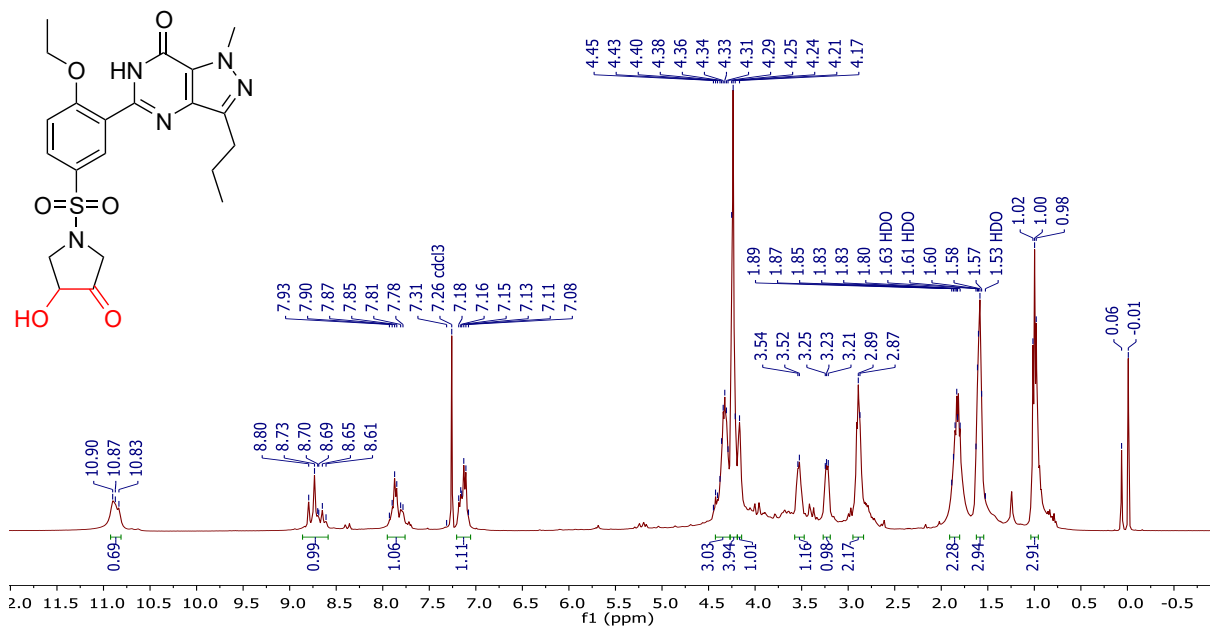

u-dialliloSil\_C\_20210513\_01/CARBON\_01.fid/fid  
Solvent: cdcl3, Scans: 1000, Relaxation: 1.0000

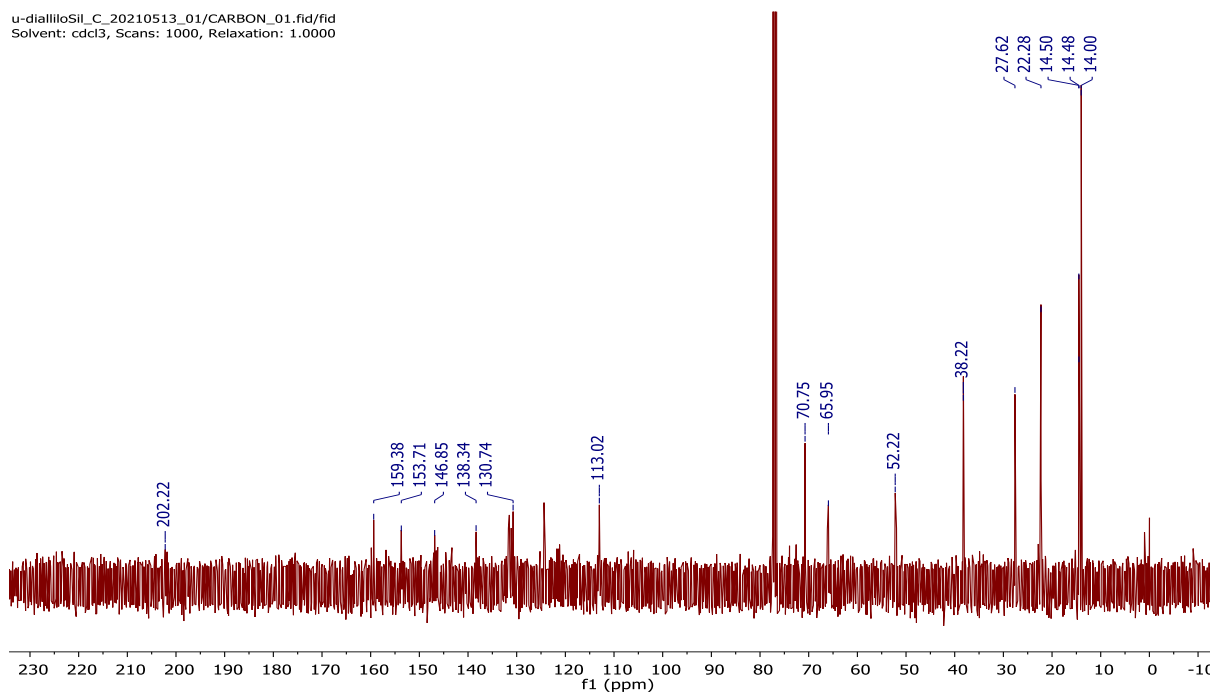

## References

### References

- [1] D. Nečas, M. Turský, I. Tišlerová, M. Katora, *New J. Chem.* **2006**, 30, 671-674.
- [2] W. Thaharn, D. Soorukram, C. Kuhakarn, V. Reutrakul, M. Pohmakotr, *J. Org. Chem.* **2018**, 83, 388-402.
- [3] G. K. Zieliński, J. Majteczak, M. Gutowski, K. Grela, *J. Org. Chem.* **2018**, 83, 2542-2553.
- [4] K. Skowerski, J. Pastva, S. J. Czarnocki, J. Janoscova, *Org. Process Res. Develop.* **2015**, 19, 872-877.
- [5] H. Clavier, K. Grela, A. Kirschning, M. Mauduit, S. P. Nolan, *Angew. Chem. Int. Ed.* **2007**, 46, 6786-6801.
- [6] A. Zasada, *MCs Thesis* **2018**.
- [7] C.-L. Tong, X.-H. Xu, F.-L. Qing, *Org. Lett.* **2019**, 21, 9532-9535.
- [8] T. Nienałtowski, P. Krzesiński, M. E. Baumert, A. Skoczeń, E. Suska-Kauf, J. Pawłowska, A. Kajetanowicz, K. Grela, *ACS Sustainable Chem. Eng.* **2020**, 8, 18215-18223.
- [9] G. Szczepaniak, K. Urbaniak, C. Wierzicka, K. Kosiński, K. Skowerski, K. Grela, *ChemSusChem* **2015**, 8, 4139-4148.
- [10] A. A. Scholte, M. H. An, M. L. Snapper, *Org. Lett.* **2006**, 8, 4759-4762.
- [11] K. A. Ostrowski, T. A. Faßbach, A. J. Vorholt, *Adv. Synth. Catal.* **2015**, 357, 1374-1380.
- [12] B. Plietker, *J. Org. Chem.* **2004**, 69, 8287-8296.
- [13] M. Gill, M. Kiefel, D. Lally, A. Ten, *Austr. J. Chem.* **1990**, 43, 1497-1518.
